# Supplementary material
Source: publisher site journal article supplement (https://www.dovepress.com/article/486300)
Supplement: Supplementary file 1 [file get_supplementary_file.php]

Supplementary Material

# Supplementary Data

Supplementary Table 1. The primer sequence

| Genes | Forward primer | Reverse primer |
| --- | --- | --- |
| CASP8 | ATGGCACTGATGGACAGGAGGC | TCCAGCAAGGGAAGGGCACTT |
| HIF1A | AGTTCCGCAAGCCCTGAAAGC | TCAGTGGTGGCAGTGGTAGTGG |
| FOS | AAGCGGAGACAGACCAACTAGAAGA | TCGGTGAGCTGCCAGGATGAA |
| EGFR | TTCGGCTGCCTCCTGGACTATG | CCAAGCGACGGTCCTCCAAGTA |
| PPARG | GCTGAATCCAGAGTCCGCTGAC | ATCGCCCTCGCCTTTGCTTTG |
| GAPDH | CGACTTCAACAGCGACACTCAC | CCCTGTTGCTGTAGCCAAATTC |

Supplementary Table 2. Summary of total bioactive components in TSGJ

| Herbs | Molecule ID | Molecule Name | OB (%) | DL |
| --- | --- | --- | --- | --- |
| Chaihu | MOL001645 | Linoleyl acetate | 42.1 | 0.2 |
| Chaihu | MOL002776 | Baicalin | 40.12 | 0.75 |
| Chaihu | MOL000449 | Stigmasterol | 43.83 | 0.76 |
| Chaihu | MOL000354 | isorhamnetin | 49.6 | 0.31 |
| Chaihu | MOL000422 | kaempferol | 41.88 | 0.24 |
| Chaihu | MOL004598 | 3,5,6,7-tetramethoxy-2- (3,4,5-trimethoxyphenyl)chromone | 31.97 | 0.59 |
| Chaihu | MOL004609 | Areapillin | 48.96 | 0.41 |
| Chaihu | MOL013187 | Cubebin | 57.13 | 0.64 |
| Chaihu | MOL004624 | Longikaurin A | 47.72 | 0.53 |
| Chaihu | MOL004628 | Octalupine | 47.82 | 0.28 |
| Chaihu | MOL004644 | Sainfuran | 79.91 | 0.23 |
| Chaihu | MOL004648 | Troxerutin | 31.6 | 0.28 |
| Chaihu | MOL004653 | (+)-Anomalin | 46.06 | 0.66 |
| Chaihu | MOL004702 | saikosaponin c_qt | 30.5 | 0.63 |
| Chaihu | MOL004718 | α-spinasterol | 42.98 | 0.76 |
| Chaihu | MOL000490 | petunidin | 30.05 | 0.31 |
| Chaihu | MOL000098 | quercetin | 46.43 | 0.28 |
| Baishao | MOL001910 | 11alpha,12alpha-epoxy-3beta-23-dihydroxy- 30-norolean-20-en-28,12beta-olide | 64.77 | 0.38 |
| Baishao | MOL001918 | paeoniflorgenone | 87.59 | 0.37 |
| Baishao | MOL001919 | (3S,5R,8R,9R,10S,14S)-3,17-dihydroxy- 4,4,8,10,14-pentamethyl-2,3,5,6,7,9- hexahydro-1H-cyclopenta[a]phenanthrene-15,16-dione | 43.56 | 0.53 |
| Baishao | MOL001921 | Lactiflorin | 49.12 | 0.8 |
| Baishao | MOL001924 | paeoniflorin | 53.87 | 0.79 |
| Baishao | MOL001925 | paeoniflorin_qt | 68.18 | 0.4 |
| Baishao | MOL001928 | albiflorin_qt | 66.64 | 0.33 |
| Baishao | MOL001930 | benzoyl paeoniflorin | 31.27 | 0.75 |
| Baishao | MOL000211 | Mairin | 55.38 | 0.78 |
| Baishao | MOL000358 | beta-sitosterol | 36.91 | 0.75 |
| Baishao | MOL000359 | sitosterol | 36.91 | 0.75 |
| Baishao | MOL000422 | kaempferol | 41.88 | 0.24 |
| Baishao | MOL000492 | (+)-catechin | 54.83 | 0.24 |
| Xiakucao | MOL000358 | beta-sitosterol | 36.91 | 0.75 |
| Xiakucao | MOL000422 | kaempferol | 41.88 | 0.24 |
| Xiakucao | MOL004355 | Spinasterol | 42.98 | 0.76 |
| Xiakucao | MOL000449 | Stigmasterol | 43.83 | 0.76 |
| Xiakucao | MOL004798 | delphinidin | 40.63 | 0.28 |
| Xiakucao | MOL000006 | luteolin | 36.16 | 0.25 |
| Xiakucao | MOL006767 | Vulgaxanthin-I | 56.14 | 0.26 |
| Xiakucao | MOL006772 | poriferasterol monoglucoside_qt | 43.83 | 0.76 |
| Xiakucao | MOL006774 | stigmast-7-enol | 37.42 | 0.75 |
| Xiakucao | MOL000737 | morin | 46.23 | 0.27 |
| Xiakucao | MOL000098 | quercetin | 46.43 | 0.28 |
| Dangshen | MOL001006 | poriferasta-7,22E-dien-3beta-ol | 42.98 | 0.76 |
| Dangshen | MOL002140 | Perlolyrine | 65.95 | 0.27 |
| Dangshen | MOL002879 | Diop | 43.59 | 0.39 |
| Dangshen | MOL003036 | ZINC03978781 | 43.83 | 0.76 |
| Dangshen | MOL000449 | Stigmasterol | 43.83 | 0.76 |
| Dangshen | MOL003896 | 7-Methoxy-2-methyl isoflavone | 42.56 | 0.2 |
| Dangshen | MOL004355 | Spinasterol | 42.98 | 0.76 |
| Dangshen | MOL004492 | Chrysanthemaxanthin | 38.72 | 0.58 |
| Dangshen | MOL005321 | Frutinone A | 65.9 | 0.34 |
| Dangshen | MOL000006 | luteolin | 36.16 | 0.25 |
| Dangshen | MOL006554 | Taraxerol | 38.4 | 0.77 |
| Dangshen | MOL006774 | stigmast-7-enol | 37.42 | 0.75 |
| Dangshen | MOL007059 | 3-beta-Hydroxymethyllenetanshiquinone | 32.16 | 0.41 |
| Dangshen | MOL007514 | methyl icosa-11,14-dienoate | 39.67 | 0.23 |
| Dangshen | MOL008391 | 5alpha-Stigmastan-3,6-dione | 33.12 | 0.79 |
| Dangshen | MOL008393 | 7-(beta-Xylosyl)cephalomannine_qt | 38.33 | 0.29 |
| Dangshen | MOL008397 | Daturilin | 50.37 | 0.77 |
| Dangshen | MOL008400 | glycitein | 50.48 | 0.24 |
| Dangshen | MOL008406 | Spinoside A | 39.97 | 0.4 |
| Dangshen | MOL008407 | (8S,9S,10R,13R,14S,17R)-17-[(E,2R,5S)-5-ethyl- 6-methylhept-3-en-2-yl]-10,13-dimethyl-1,2,4,7,8,9,11,12,14,15,16,17- dodecahydrocyclopenta[a]phenanthren-3-one | 45.4 | 0.76 |
| Dangshen | MOL008411 | 11-Hydroxyrankinidine | 40 | 0.66 |
| Wangbu liuxing | MOL000449 | Stigmasterol | 43.83 | 0.76 |
| Wangbu liuxing | MOL002322 | isovitexin | 31.29 | 0.72 |
| Wangbu liuxing | MOL008908 | (3S,6S,9S,12S)-6-(1H-indol-3-ylmethyl)-12- isopropyl-3,9-dimethyl-1,4,7,10,13- pentazacyclopentadecane-2,5,8,11,14-pentone | 33.27 | 0.78 |
| Wangbu liuxing | MOL000098 | quercetin | 46.43 | 0.28 |
| Huangqin | MOL001689 | acacetin | 34.97 | 0.24 |
| Huangqin | MOL000173 | wogonin | 30.68 | 0.23 |
| Huangqin | MOL000228 | (2R)-7-hydroxy-5-methoxy-2-phenylchroman-4-one | 55.23 | 0.2 |
| Huangqin | MOL002714 | baicalein | 33.52 | 0.21 |
| Huangqin | MOL002908 | 5,8,2'-Trihydroxy-7-methoxyflavone | 37.01 | 0.27 |
| Huangqin | MOL002909 | 5,7,2,5-tetrahydroxy-8,6-dimethoxyflavone | 33.82 | 0.45 |
| Huangqin | MOL002910 | Carthamidin | 41.15 | 0.24 |
| Huangqin | MOL002911 | 2,6,2',4'-tetrahydroxy-6'-methoxychaleone | 69.04 | 0.22 |
| Huangqin | MOL002913 | Dihydrobaicalin_qt | 40.04 | 0.21 |
| Huangqin | MOL002914 | Eriodyctiol (flavanone) | 41.35 | 0.24 |
| Huangqin | MOL002915 | Salvigenin | 49.07 | 0.33 |
| Huangqin | MOL002917 | 5,2',6'-Trihydroxy-7,8-dimethoxyflavone | 45.05 | 0.33 |
| Huangqin | MOL002925 | 5,7,2',6'-Tetrahydroxyflavone | 37.01 | 0.24 |
| Huangqin | MOL002926 | dihydrooroxylin A | 38.72 | 0.23 |
| Huangqin | MOL002927 | Skullcapflavone II | 69.51 | 0.44 |
| Huangqin | MOL002928 | oroxylin a | 41.37 | 0.23 |
| Huangqin | MOL002932 | Panicolin | 76.26 | 0.29 |
| Huangqin | MOL002933 | 5,7,4'-Trihydroxy-8-methoxyflavone | 36.56 | 0.27 |
| Huangqin | MOL002934 | NEOBAICALEIN | 104.34 | 0.44 |
| Huangqin | MOL002937 | DIHYDROOROXYLIN | 66.06 | 0.23 |
| Huangqin | MOL000358 | beta-sitosterol | 36.91 | 0.75 |
| Huangqin | MOL000359 | sitosterol | 36.91 | 0.75 |
| Huangqin | MOL000525 | Norwogonin | 39.4 | 0.21 |
| Huangqin | MOL000552 | 5,2'-Dihydroxy-6,7,8-trimethoxyflavone | 31.71 | 0.35 |
| Huangqin | MOL000073 | ent-Epicatechin | 48.96 | 0.24 |
| Huangqin | MOL000449 | Stigmasterol | 43.83 | 0.76 |
| Huangqin | MOL001458 | coptisine | 30.67 | 0.86 |
| Huangqin | MOL001490 | bis[(2S)-2-ethylhexyl] benzene-1,2-dicarboxylate | 43.59 | 0.35 |
| Huangqin | MOL001506 | Supraene | 33.55 | 0.42 |
| Huangqin | MOL002879 | Diop | 43.59 | 0.39 |
| Huangqin | MOL002897 | epiberberine | 43.09 | 0.78 |
| Huangqin | MOL008206 | Moslosooflavone | 44.09 | 0.25 |
| Huangqin | MOL010415 | 11,13-Eicosadienoic acid, methyl ester | 39.28 | 0.23 |
| Huangqin | MOL012245 | 5,7,4'-trihydroxy-6-methoxyflavanone | 36.63 | 0.27 |
| Huangqin | MOL012246 | 5,7,4'-trihydroxy-8-methoxyflavanone | 74.24 | 0.26 |
| Huangqin | MOL012266 | rivularin | 37.94 | 0.37 |

Supplementary Table 3. Summary of target genes of the bioactive compounds in TSGJ

| Herb | MolId | MolName | Symbol |
| --- | --- | --- | --- |
| Baishao | MOL001918 | paeoniflorgenone | GABRA1 |
| MOL001919 | (3S,5R,8R,9R,10S,14S)-3,17-dihydroxy- 4,4,8,10,14-pentamethyl-2,3,5,6,7,9-hexahydro- 1H-cyclopenta[a]phenanthrene-15,16-dione | PGR |
| NR3C2 |
| MOL001924 | paeoniflorin | TNF |
| IL6 |
| CD14 |
| LBP |
| MOL000211 | Mairin | PGR |
| MOL000358 | beta-sitosterol | PGR |
| NCOA2 |
| PTGS1 |
| PTGS2 |
| HSP90AA1 |
| KCNH2 |
| DRD1 |
| CHRM3 |
| CHRM1 |
| SCN5A |
| CHRM4 |
| ADRA1A |
| CHRM2 |
| ADRA1B |
| ADRB2 |
| CHRNA2 |
| SLC6A4 |
| OPRM1 |
| GABRA1 |
| BCL2 |
| BAX |
| CASP9 |
| CASP3 |
| CASP8 |
| PRKCA |
| PON1 |
| MAP2 |
| MOL000359 | sitosterol | PGR |
| NCOA2 |
| NR3C2 |
| MOL000422 | kaempferol | NOS2 |
| PTGS1 |
| AR |
| PPARG |
| PTGS2 |
| HSP90AA1 |
| NCOA2 |
| DPP4 |
| PRSS1 |
| PGR |
| CHRM1 |
| ACHE |
| SLC6A2 |
| CHRM2 |
| ADRA1B |
| GABRA1 |
| F7 |
| CAMTA2 |
| RELA |
| IKBKB |
| AKT1 |
| BCL2 |
| BAX |
| TNF |
| AHSA1 |
| CASP3 |
| MAPK8 |
| MMP1 |
| STAT1 |
| CDK1 |
| PPARG |
| HMOX1 |
| CYP3A4 |
| CYP1A2 |
| CYP1A1 |
| ICAM1 |
| SELE |
| VCAM1 |
| NR1I2 |
| CYP1B1 |
| ALOX5 |
| HAS2 |
| GSTP1 |
| AHR |
| PSMD3 |
| SLC2A4 |
| NR1I3 |
| INSR |
| DIO1 |
| PPP3CA |
| GSTM1 |
| GSTM2 |
| AKR1C3 |
| SLPI |
| MOL000492 | (+)-catechin | PTGS1 |
| ESR1 |
| PTGS2 |
| HSP90AA1 |
| DPEP1 |
| NCOA2 |
| CAMTA2 |
| RXRA |
| CAT |
| HAS2 |
| Chaihu | MOL001645 | Linoleyl acetate | PTGS1 |
| PTGS2 |
| NCOA2 |
| RXRA |
| MOL000449 | Stigmasterol | PGR |
| NR3C2 |
| NCOA2 |
| ADH1C |
| IGHG1 |
| RXRA |
| NCOA1 |
| PTGS1 |
| PTGS2 |
| ADRA2A |
| SLC6A2 |
| SLC6A3 |
| ADRB2 |
| AKR1B1 |
| PLAU |
| LTA4H |
| MAOB |
| MAOA |
| CTRB1 |
| CHRM3 |
| CHRM1 |
| ADRB1 |
| SCN5A |
| ADRA1A |
| CHRM2 |
| ADRA1B |
| GABRA1 |
| MOL000354 | isorhamnetin | NOS2 |
| PTGS1 |
| ESR1 |
| AR |
| PPARG |
| PTGS2 |
| ESR2 |
| DPP4 |
| MAPK14 |
| GSK3B |
| HSP90AA1 |
| CDK2 |
| PRSS1 |
| CCNA2 |
| NCOA2 |
| CAMTA2 |
| PYGM |
| PPARD |
| CHEK1 |
| AKR1B1 |
| NCOA1 |
| F7 |
| ACHE |
| GABRA1 |
| MAOB |
| GRIA2 |
| RELA |
| NCF1 |
| OLR1 |
| MOL000422 | kaempferol | NOS2 |
| PTGS1 |
| AR |
| PPARG |
| PTGS2 |
| HSP90AA1 |
| NCOA2 |
| DPP4 |
| PRSS1 |
| PGR |
| CHRM1 |
| ACHE |
| SLC6A2 |
| CHRM2 |
| ADRA1B |
| GABRA1 |
| F7 |
| CAMTA2 |
| RELA |
| IKBKB |
| AKT1 |
| BCL2 |
| BAX |
| TNF |
| AHSA1 |
| CASP3 |
| MAPK8 |
| MMP1 |
| STAT1 |
| CDK1 |
| PPARG |
| HMOX1 |
| CYP3A4 |
| CYP1A2 |
| CYP1A1 |
| ICAM1 |
| SELE |
| VCAM1 |
| NR1I2 |
| CYP1B1 |
| ALOX5 |
| HAS2 |
| GSTP1 |
| AHR |
| PSMD3 |
| SLC2A4 |
| NR1I3 |
| INSR |
| DIO1 |
| PPP3CA |
| GSTM1 |
| GSTM2 |
| AKR1C3 |
| SLPI |
| MOL004598 | 3,5,6,7-tetramethoxy-2-(3,4,5-trimethoxyphenyl)chromone | ESR1 |
| AR |
| PTGS2 |
| F7 |
| ACHE |
| ESR2 |
| PRSS1 |
| NCOA2 |
| CAMTA2 |
| MOL004609 | Areapillin | NOS2 |
| AR |
| SCN5A |
| PTGS2 |
| F7 |
| ESR2 |
| DPP4 |
| HSP90AA1 |
| IGHG1 |
| PRSS1 |
| NCOA2 |
| NCOA1 |
| CAMTA2 |
| MOL013187 | Cubebin | PTGS1 |
| PTGS2 |
| ADRB2 |
| HSP90AA1 |
| MOL004624 | Longikaurin A | CHRM1 |
| CHRM2 |
| PRSS1 |
| MOL004653 | (+)-Anomalin | KCNH2 |
| PTGS2 |
| DPP4 |
| MOL004718 | α-spinasterol | PGR |
| NR3C2 |
| NCOA2 |
| MOL000490 | petunidin | NOS2 |
| PTGS1 |
| PTGS2 |
| ESR2 |
| MAPK14 |
| GSK3B |
| HSP90AA1 |
| NCOA2 |
| MOL000098 | quercetin | PTGS1 |
| AR |
| PPARG |
| PTGS2 |
| HSP90AA1 |
| NCOA2 |
| DPP4 |
| AKR1B1 |
| PRSS1 |
| KCNH2 |
| SCN5A |
| ADRB2 |
| MMP3 |
| F7 |
| RXRA |
| ACHE |
| GABRA1 |
| MAOB |
| RELA |
| EGFR |
| AKT1 |
| VEGFA |
| CCND1 |
| BCL2 |
| BCL2L1 |
| FOS |
| CDKN1A |
| EIF6 |
| BAX |
| CASP9 |
| PLAU |
| MMP2 |
| MMP9 |
| MAPK1 |
| IL10 |
| EGF |
| RB1 |
| TNF |
| IL6 |
| AHSA1 |
| CASP3 |
| TP53 |
| ELK1 |
| NFKBIA |
| POR |
| ODC1 |
| CASP8 |
| TOP1 |
| RAF1 |
| SOD1 |
| PRKCA |
| MMP1 |
| HIF1A |
| STAT1 |
| RUNX1T1 |
| CDK1 |
| HSPA5 |
| ERBB2 |
| PPARG |
| ACACA |
| HMOX1 |
| CYP3A4 |
| CYP1A2 |
| CAV1 |
| MYC |
| F3 |
| GJA1 |
| CYP1A1 |
| ICAM1 |
| IL1B |
| CCL2 |
| SELE |
| VCAM1 |
| PTGER3 |
| CXCL8 |
| PRKCB |
| BIRC5 |
| DUOX2 |
| NOS3 |
| HSPB1 |
| SULT1E1 |
| IL2RA |
| NR1I2 |
| CYP1B1 |
| CCNB1 |
| PLAT |
| THBD |
| SERPINE1 |
| COL1A1 |
| IFNG |
| ALOX5 |
| IL1A |
| MPO |
| TOP2A |
| NCF1 |
| ABCG2 |
| HAS2 |
| GSTP1 |
| NFE2L2 |
| NQO1 |
| PARP1 |
| AHR |
| PSMD3 |
| SLC2A4 |
| COL3A1 |
| CXCL11 |
| CXCL2 |
| DCAF5 |
| NR1I3 |
| CHEK2 |
| INSR |
| CLDN4 |
| PPARA |
| PPARD |
| HSF1 |
| CXCL10 |
| CHUK |
| SPP1 |
| RUNX2 |
| RASSF1 |
| E2F1 |
| E2F2 |
| ACP3 |
| CTSD |
| IGFBP3 |
| IGF2 |
| CD40LG |
| IRF1 |
| ERBB3 |
| PON1 |
| DIO1 |
| PCOLCE |
| NPEPPS |
| HK2 |
| RASA1 |
| GSTM1 |
| GSTM2 |
| Dangshen | MOL001006 | poriferasta-7,22E-dien-3beta-ol | PGR |
| NCOA2 |
| NR3C2 |
| MOL002140 | Perlolyrine | PTGS2 |
| RXRA |
| MOL002879 | Diop | SCN5A |
| ADRB2 |
| CHRM3 |
| MOL003036 | ZINC03978781 | PGR |
| NCOA2 |
| NR3C2 |
| MOL000449 | Stigmasterol | PGR |
| NR3C2 |
| NCOA2 |
| ADH1C |
| IGHG1 |
| RXRA |
| NCOA1 |
| PTGS1 |
| PTGS2 |
| ADRA2A |
| SLC6A2 |
| SLC6A3 |
| ADRB2 |
| AKR1B1 |
| PLAU |
| LTA4H |
| MAOB |
| MAOA |
| CTRB1 |
| CHRM3 |
| CHRM1 |
| ADRB1 |
| SCN5A |
| ADRA1A |
| CHRM2 |
| ADRA1B |
| GABRA1 |
| MOL003896 | 7-Methoxy-2-methyl isoflavone | NOS2 |
| PTGS1 |
| DRD1 |
| CHRM3 |
| CHRM1 |
| ESR1 |
| AR |
| ADRB1 |
| SCN5A |
| PPARG |
| PTGS2 |
| RXRA |
| ACHE |
| ADRA1B |
| SLC6A3 |
| ADRB2 |
| ADRA1D |
| SLC6A4 |
| ESR2 |
| GABRA1 |
| DPP4 |
| MAPK14 |
| GSK3B |
| HSP90AA1 |
| CDK2 |
| LTA4H |
| MAOB |
| CHEK1 |
| IGHG1 |
| PRSS1 |
| CCNA2 |
| NCOA1 |
| PKIA |
| CAMTA2 |
| CHRM5 |
| OPRM1 |
| NCOA2 |
| MOL004355 | Spinasterol | PGR |
| NR3C2 |
| NCOA2 |
| MOL005321 | Frutinone A | PTGS1 |
| AR |
| SCN5A |
| PPARG |
| PTGS2 |
| RXRA |
| ADRB2 |
| GABRA1 |
| DPP4 |
| HSP90AA1 |
| ACHE |
| MOL000006 | luteolin | PTGS1 |
| AR |
| PTGS2 |
| HSP90AA1 |
| PRSS1 |
| NCOA2 |
| DPP4 |
| RELA |
| EGFR |
| AKT1 |
| VEGFA |
| CCND1 |
| BCL2L1 |
| CDKN1A |
| CASP9 |
| MMP2 |
| MMP9 |
| MAPK1 |
| IL10 |
| RB1 |
| CDK4 |
| TNF |
| IL6 |
| CASP3 |
| TP53 |
| NFKBIA |
| TOP1 |
| MDM2 |
| APP |
| MMP1 |
| PCNA |
| ERBB2 |
| PPARG |
| HMOX1 |
| CASP7 |
| ICAM1 |
| MCL1 |
| BIRC5 |
| IL2RA |
| CCNB1 |
| TYR |
| IFNG |
| IL4 |
| TOP2A |
| GSTP1 |
| XIAP |
| SLC2A4 |
| INSR |
| CD40LG |
| PTGES |
| NUF2 |
| ADCY2 |
| MET |
| MOL006774 | stigmast-7-enol | PGR |
| NCOA2 |
| MOL007059 | 3-beta-Hydroxymethyllenetanshiquinone | DRD1 |
| CHRM1 |
| PTGS2 |
| CA2 |
| RXRA |
| OPRD1 |
| ACHE |
| ADRA1A |
| ADRB2 |
| OPRM1 |
| DPP4 |
| HSP90AA1 |
| IGHG1 |
| PRSS1 |
| NCOA1 |
| MOL007514 | methyl icosa-11,14-dienoate | NCOA2 |
| MOL008393 | 7-(beta-Xylosyl)cephalomannine_qt | TUBB1 |
| MOL008397 | Daturilin | NR3C1 |
| MOL008400 | glycitein | PTGS1 |
| ESR1 |
| AR |
| PPARG |
| PTGS2 |
| RXRA |
| ESR2 |
| MAPK14 |
| GSK3B |
| HSP90AA1 |
| CDK2 |
| CHEK1 |
| PRSS1 |
| CCNA2 |
| CAMTA2 |
| NCOA1 |
| NOS2 |
| APP |
| MMP13 |
| MMP8 |
| MOL008407 | (8S,9S,10R,13R,14S,17R)-17-[(E,2R,5S)-5-ethyl- 6-methylhept-3-en-2-yl]-10,13-dimethyl- 1,2,4,7,8,9,11,12,14,15,16,17-dodecahydrocyclopenta[a]phenanthren-3-one | PGR |
| NR3C2 |
| MOL008411 | 11-Hydroxyrankinidine | ESR1 |
| SCN5A |
| OPRM1 |
| CDK2 |
| Huangqin | MOL001689 | acacetin | NOS2 |
| PTGS1 |
| AR |
| PTGS2 |
| DPP4 |
| HSP90AA1 |
| CDK2 |
| PRSS1 |
| NCOA2 |
| NCOA1 |
| CAMTA2 |
| CHEK1 |
| ADRB2 |
| RELA |
| BCL2 |
| CDKN1A |
| BAX |
| CASP3 |
| TP53 |
| CASP8 |
| FASN |
| FASLG |
| CYP19A1 |
| MOL000173 | wogonin | NOS2 |
| PTGS1 |
| ESR1 |
| AR |
| SCN5A |
| PPARG |
| PTGS2 |
| RXRA |
| DPP4 |
| MAPK14 |
| GSK3B |
| HSP90AA1 |
| CDK2 |
| CHEK1 |
| PRSS1 |
| CAMTA2 |
| ADRB2 |
| GABRA1 |
| RELA |
| AKT1 |
| CCND1 |
| BCL2 |
| CDKN1A |
| EIF6 |
| BAX |
| CASP9 |
| KDR |
| TNF |
| IL6 |
| AHSA1 |
| CASP3 |
| TP53 |
| TEP1 |
| MMP1 |
| CCL2 |
| PRKCD |
| PTGER3 |
| FSD2 |
| CXCL8 |
| MCL1 |
| MOL000228 | (2R)-7-hydroxy-5-methoxy-2-phenylchroman-4-one | PTGS1 |
| DRD1 |
| CHRM3 |
| CHRM1 |
| ESR1 |
| SCN5A |
| PTGS2 |
| RXRA |
| ADRA1A |
| ADRA1B |
| SLC6A3 |
| ADRB2 |
| SLC6A4 |
| GABRA1 |
| HSP90AA1 |
| PKIA |
| MAOB |
| CAMTA2 |
| MOL002714 | baicalein | PTGS1 |
| AR |
| PTGS2 |
| HSP90AA1 |
| DPP4 |
| PRSS1 |
| NCOA2 |
| NCOA1 |
| CAMTA2 |
| RELA |
| AKT1 |
| VEGFA |
| BCL2 |
| FOS |
| BAX |
| MMP9 |
| CASP3 |
| TP53 |
| HIF1A |
| FOSL1 |
| FOSL2 |
| CDK1 |
| CCNB1 |
| MPO |
| AHR |
| IGF2 |
| CYCS |
| NFATC1 |
| TDRD7 |
| EGLN1 |
| NOX5 |
| FABP5 |
| APOD |
| MOL002909 | 5,7,2,5-tetrahydroxy-8,6-dimethoxyflavone | NOS2 |
| AR |
| PTGS2 |
| DPP4 |
| PYGM |
| HSP90AA1 |
| PRSS1 |
| NCOA2 |
| MOL002910 | Carthamidin | PTGS1 |
| PTGS2 |
| HSP90AA1 |
| MOL002913 | Dihydrobaicalin_qt | PTGS1 |
| PTGS2 |
| HSP90AA1 |
| MOL002914 | Eriodyctiol (flavanone) | PTGS1 |
| PTGS2 |
| HSP90AA1 |
| NCOA2 |
| PYGM |
| CAMTA2 |
| MOL002915 | Salvigenin | NOS2 |
| PTGS1 |
| SCN5A |
| PTGS2 |
| RXRA |
| ACHE |
| ADRA1B |
| ADRB2 |
| DPP4 |
| HSP90AA1 |
| IGHG1 |
| PRSS1 |
| NCOA2 |
| CAMTA2 |
| F7 |
| MOL002917 | 5,2',6'-Trihydroxy-7,8-dimethoxyflavone | NOS2 |
| PTGS1 |
| AR |
| SCN5A |
| PTGS2 |
| ESR2 |
| DPP4 |
| HSP90AA1 |
| CDK2 |
| CHEK1 |
| PRSS1 |
| NCOA2 |
| CAMTA2 |
| MOL002925 | 5,7,2',6'-Tetrahydroxyflavone | PTGS1 |
| AR |
| PTGS2 |
| DPP4 |
| HSP90AA1 |
| MOL002927 | Skullcapflavone II | NOS2 |
| PTGS1 |
| KCNH2 |
| AR |
| SCN5A |
| PTGS2 |
| F7 |
| KDR |
| CACNA2D1 |
| DPP4 |
| HSP90AA1 |
| IGHG1 |
| PRSS1 |
| NCOA2 |
| NCOA1 |
| CAMTA2 |
| MOL002928 | oroxylin a | NOS2 |
| PTGS1 |
| AR |
| SCN5A |
| PTGS2 |
| RXRA |
| ADRA1B |
| ADRB2 |
| DPP4 |
| HSP90AA1 |
| PRSS1 |
| NCOA1 |
| CAMTA2 |
| NCOA2 |
| PKIA |
| BCL2 |
| IL6 |
| CASP3 |
| CDK1 |
| CYP1A2 |
| CCNB1 |
| CDK7 |
| CYP2C9 |
| MOL002932 | Panicolin | NOS2 |
| PTGS1 |
| AR |
| SCN5A |
| PTGS2 |
| ESR2 |
| DPP4 |
| HSP90AA1 |
| CDK2 |
| CHEK1 |
| PRSS1 |
| CAMTA2 |
| NCOA1 |
| MOL002933 | 5,7,4'-Trihydroxy-8-methoxyflavone | NOS2 |
| PTGS1 |
| ESR1 |
| AR |
| PPARG |
| PTGS2 |
| DPP4 |
| PYGM |
| MAPK14 |
| GSK3B |
| HSP90AA1 |
| CDK2 |
| CHEK1 |
| PRSS1 |
| NCOA2 |
| CAMTA2 |
| MOL002934 | NEOBAICALEIN | NOS2 |
| KCNH2 |
| ESR1 |
| AR |
| SCN5A |
| PPARG |
| PTGS2 |
| F7 |
| ESR2 |
| DPP4 |
| PYGM |
| GSK3B |
| HSP90AA1 |
| CHEK1 |
| PRSS1 |
| NCOA2 |
| CAMTA2 |
| MOL002937 | DIHYDROOROXYLIN | PTGS1 |
| SCN5A |
| PTGS2 |
| RXRA |
| ADRA1B |
| ADRB2 |
| HSP90AA1 |
| CAMTA2 |
| NCOA1 |
| MOL000358 | beta-sitosterol | PGR |
| NCOA2 |
| PTGS1 |
| PTGS2 |
| HSP90AA1 |
| KCNH2 |
| DRD1 |
| CHRM3 |
| CHRM1 |
| SCN5A |
| CHRM4 |
| ADRA1A |
| CHRM2 |
| ADRA1B |
| ADRB2 |
| CHRNA2 |
| SLC6A4 |
| OPRM1 |
| GABRA1 |
| BCL2 |
| BAX |
| CASP9 |
| CASP3 |
| CASP8 |
| PRKCA |
| PON1 |
| MAP2 |
| MOL000359 | sitosterol | PGR |
| NCOA2 |
| NR3C2 |
| MOL000525 | Norwogonin | NOS2 |
| PTGS1 |
| AR |
| PPARG |
| PTGS2 |
| DPP4 |
| HSP90AA1 |
| CDK2 |
| CHEK1 |
| MOL000552 | 5,2'-Dihydroxy-6,7,8-trimethoxyflavone | NOS2 |
| PTGS1 |
| KCNH2 |
| AR |
| SCN5A |
| PTGS2 |
| F7 |
| ESR2 |
| DPP4 |
| PPARD |
| HSP90AA1 |
| PRSS1 |
| NCOA2 |
| CAMTA2 |
| KDR |
| NCOA1 |
| MOL000073 | ent-Epicatechin | PTGS1 |
| ESR1 |
| PTGS2 |
| HSP90AA1 |
| DPEP1 |
| MOL000449 | Stigmasterol | PGR |
| NR3C2 |
| NCOA2 |
| ADH1C |
| IGHG1 |
| RXRA |
| NCOA1 |
| PTGS1 |
| PTGS2 |
| ADRA2A |
| SLC6A2 |
| SLC6A3 |
| ADRB2 |
| AKR1B1 |
| PLAU |
| LTA4H |
| MAOB |
| MAOA |
| CTRB1 |
| CHRM3 |
| CHRM1 |
| ADRB1 |
| SCN5A |
| ADRA1A |
| CHRM2 |
| ADRA1B |
| GABRA1 |
| MOL001458 | coptisine | NOS2 |
| PTGS1 |
| KCNH2 |
| ESR1 |
| AR |
| SCN5A |
| PTGS2 |
| PRSS1 |
| MOL001490 | bis[(2S)-2-ethylhexyl] benzene-1,2-dicarboxylate | SCN5A |
| MOL002879 | Diop | SCN5A |
| ADRB2 |
| CHRM3 |
| MOL002897 | epiberberine | NOS2 |
| KCNH2 |
| ESR1 |
| AR |
| PTGS2 |
| RXRA |
| PRSS1 |
| NCOA2 |
| PDE10A |
| MOL008206 | Moslosooflavone | NOS2 |
| PTGS1 |
| AR |
| SCN5A |
| PPARG |
| PTGS2 |
| RXRA |
| ESR2 |
| GABRA1 |
| DPP4 |
| MAPK14 |
| GSK3B |
| HSP90AA1 |
| CDK2 |
| CHEK1 |
| PRSS1 |
| NCOA1 |
| CAMTA2 |
| ADRA1B |
| ADRB2 |
| MOL010415 | 11,13-Eicosadienoic acid, methyl ester | NCOA2 |
| MOL012245 | 5,7,4'-trihydroxy-6-methoxyflavanone | PTGS1 |
| PTGS2 |
| CA2 |
| HSP90AA1 |
| CAMTA2 |
| MOL012246 | 5,7,4'-trihydroxy-8-methoxyflavanone | PTGS1 |
| PTGS2 |
| CA2 |
| HSP90AA1 |
| MOL012266 | rivularin | NOS2 |
| PTGS1 |
| KCNH2 |
| AR |
| SCN5A |
| PTGS2 |
| CA2 |
| F7 |
| KDR |
| RXRA |
| ESR2 |
| DPP4 |
| HSP90AA1 |
| PRSS1 |
| NCOA2 |
| NCOA1 |
| CAMTA2 |
| wangbuliuxing | MOL000449 | Stigmasterol | PGR |
| NR3C2 |
| NCOA2 |
| ADH1C |
| IGHG1 |
| RXRA |
| NCOA1 |
| PTGS1 |
| PTGS2 |
| ADRA2A |
| SLC6A2 |
| SLC6A3 |
| ADRB2 |
| AKR1B1 |
| PLAU |
| LTA4H |
| MAOB |
| MAOA |
| CTRB1 |
| CHRM3 |
| CHRM1 |
| ADRB1 |
| SCN5A |
| ADRA1A |
| CHRM2 |
| ADRA1B |
| GABRA1 |
| MOL002322 | isovitexin | PTGS2 |
| AR |
| RELA |
| IKBKB |
| TNF |
| MOL008908 | (3S,6S,9S,12S)-6-(1H-indol-3-ylmethyl)-12-isopropyl- 3,9-dimethyl-1,4,7,10,13-pentazacyclopentadecane- 2,5,8,11,14-pentone | PTGS2 |
| MOL000098 | quercetin | PTGS1 |
| AR |
| PPARG |
| PTGS2 |
| HSP90AA1 |
| NCOA2 |
| DPP4 |
| AKR1B1 |
| PRSS1 |
| KCNH2 |
| SCN5A |
| ADRB2 |
| MMP3 |
| F7 |
| RXRA |
| ACHE |
| GABRA1 |
| MAOB |
| RELA |
| EGFR |
| AKT1 |
| VEGFA |
| CCND1 |
| BCL2 |
| BCL2L1 |
| FOS |
| CDKN1A |
| EIF6 |
| BAX |
| CASP9 |
| PLAU |
| MMP2 |
| MMP9 |
| MAPK1 |
| IL10 |
| EGF |
| RB1 |
| TNF |
| IL6 |
| AHSA1 |
| CASP3 |
| TP53 |
| ELK1 |
| NFKBIA |
| POR |
| ODC1 |
| CASP8 |
| TOP1 |
| RAF1 |
| SOD1 |
| PRKCA |
| MMP1 |
| HIF1A |
| STAT1 |
| RUNX1T1 |
| CDK1 |
| HSPA5 |
| ERBB2 |
| PPARG |
| ACACA |
| HMOX1 |
| CYP3A4 |
| CYP1A2 |
| CAV1 |
| MYC |
| F3 |
| GJA1 |
| CYP1A1 |
| ICAM1 |
| IL1B |
| CCL2 |
| SELE |
| VCAM1 |
| PTGER3 |
| CXCL8 |
| PRKCB |
| BIRC5 |
| DUOX2 |
| NOS3 |
| HSPB1 |
| SULT1E1 |
| IL2RA |
| NR1I2 |
| CYP1B1 |
| CCNB1 |
| PLAT |
| THBD |
| SERPINE1 |
| COL1A1 |
| IFNG |
| ALOX5 |
| IL1A |
| MPO |
| TOP2A |
| NCF1 |
| ABCG2 |
| HAS2 |
| GSTP1 |
| NFE2L2 |
| NQO1 |
| PARP1 |
| AHR |
| PSMD3 |
| SLC2A4 |
| COL3A1 |
| CXCL11 |
| CXCL2 |
| DCAF5 |
| NR1I3 |
| CHEK2 |
| INSR |
| CLDN4 |
| PPARA |
| PPARD |
| HSF1 |
| CXCL10 |
| CHUK |
| SPP1 |
| RUNX2 |
| RASSF1 |
| E2F1 |
| E2F2 |
| ACP3 |
| CTSD |
| IGFBP3 |
| IGF2 |
| CD40LG |
| IRF1 |
| ERBB3 |
| PON1 |
| DIO1 |
| PCOLCE |
| NPEPPS |
| HK2 |
| RASA1 |
| GSTM1 |
| GSTM2 |
| Xiakucao | MOL000358 | beta-sitosterol | PGR |
| NCOA2 |
| PTGS1 |
| PTGS2 |
| HSP90AA1 |
| KCNH2 |
| DRD1 |
| CHRM3 |
| CHRM1 |
| SCN5A |
| CHRM4 |
| ADRA1A |
| CHRM2 |
| ADRA1B |
| ADRB2 |
| CHRNA2 |
| SLC6A4 |
| OPRM1 |
| GABRA1 |
| BCL2 |
| BAX |
| CASP9 |
| CASP3 |
| CASP8 |
| PRKCA |
| PON1 |
| MAP2 |
| MOL000422 | kaempferol | NOS2 |
| PTGS1 |
| AR |
| PPARG |
| PTGS2 |
| HSP90AA1 |
| NCOA2 |
| DPP4 |
| PRSS1 |
| PGR |
| CHRM1 |
| ACHE |
| SLC6A2 |
| CHRM2 |
| ADRA1B |
| GABRA1 |
| F7 |
| CAMTA2 |
| RELA |
| IKBKB |
| AKT1 |
| BCL2 |
| BAX |
| TNF |
| AHSA1 |
| CASP3 |
| MAPK8 |
| MMP1 |
| STAT1 |
| CDK1 |
| PPARG |
| HMOX1 |
| CYP3A4 |
| CYP1A2 |
| CYP1A1 |
| ICAM1 |
| SELE |
| VCAM1 |
| NR1I2 |
| CYP1B1 |
| ALOX5 |
| HAS2 |
| GSTP1 |
| AHR |
| PSMD3 |
| SLC2A4 |
| NR1I3 |
| INSR |
| DIO1 |
| PPP3CA |
| GSTM1 |
| GSTM2 |
| AKR1C3 |
| SLPI |
| MOL004355 | Spinasterol | PGR |
| NR3C2 |
| NCOA2 |
| MOL000449 | Stigmasterol | PGR |
| NR3C2 |
| NCOA2 |
| ADH1C |
| IGHG1 |
| RXRA |
| NCOA1 |
| PTGS1 |
| PTGS2 |
| ADRA2A |
| SLC6A2 |
| SLC6A3 |
| ADRB2 |
| AKR1B1 |
| PLAU |
| LTA4H |
| MAOB |
| MAOA |
| CTRB1 |
| CHRM3 |
| CHRM1 |
| ADRB1 |
| SCN5A |
| ADRA1A |
| CHRM2 |
| ADRA1B |
| GABRA1 |
| MOL004798 | delphinidin | NOS2 |
| PTGS1 |
| AR |
| PTGS2 |
| CA2 |
| HSP90AA1 |
| NCOA2 |
| MOL000006 | luteolin | PTGS1 |
| AR |
| PTGS2 |
| HSP90AA1 |
| PRSS1 |
| NCOA2 |
| DPP4 |
| RELA |
| EGFR |
| AKT1 |
| VEGFA |
| CCND1 |
| BCL2L1 |
| CDKN1A |
| CASP9 |
| MMP2 |
| MMP9 |
| MAPK1 |
| IL10 |
| RB1 |
| CDK4 |
| TNF |
| IL6 |
| CASP3 |
| TP53 |
| NFKBIA |
| TOP1 |
| MDM2 |
| APP |
| MMP1 |
| PCNA |
| ERBB2 |
| PPARG |
| HMOX1 |
| CASP7 |
| ICAM1 |
| MCL1 |
| BIRC5 |
| IL2RA |
| CCNB1 |
| TYR |
| IFNG |
| IL4 |
| TOP2A |
| GSTP1 |
| XIAP |
| SLC2A4 |
| INSR |
| CD40LG |
| PTGES |
| NUF2 |
| ADCY2 |
| MET |
| MOL006767 | Vulgaxanthin-I | NOS2 |
| PTGS2 |
| MOL006772 | poriferasterol monoglucoside_qt | PGR |
| NCOA2 |
| MOL006774 | stigmast-7-enol | PGR |
| NCOA2 |
| MOL000737 | morin | PTGS1 |
| AR |
| PPARG |
| PTGS2 |
| DPP4 |
| HSP90AA1 |
| TOP1 |
| EDN1 |
| ABCB1 |
| ALOX5 |
| CD36 |
| DIO1 |
| GSR |
| BATF3 |
| MOL000098 | quercetin | PTGS1 |
| AR |
| PPARG |
| PTGS2 |
| HSP90AA1 |
| NCOA2 |
| DPP4 |
| AKR1B1 |
| PRSS1 |
| KCNH2 |
| SCN5A |
| ADRB2 |
| MMP3 |
| F7 |
| RXRA |
| ACHE |
| GABRA1 |
| MAOB |
| RELA |
| EGFR |
| AKT1 |
| VEGFA |
| CCND1 |
| BCL2 |
| BCL2L1 |
| FOS |
| CDKN1A |
| EIF6 |
| BAX |
| CASP9 |
| PLAU |
| MMP2 |
| MMP9 |
| MAPK1 |
| IL10 |
| EGF |
| RB1 |
| TNF |
| IL6 |
| AHSA1 |
| CASP3 |
| TP53 |
| ELK1 |
| NFKBIA |
| POR |
| ODC1 |
| CASP8 |
| TOP1 |
| RAF1 |
| SOD1 |
| PRKCA |
| MMP1 |
| HIF1A |
| STAT1 |
| RUNX1T1 |
| CDK1 |
| HSPA5 |
| ERBB2 |
| PPARG |
| ACACA |
| HMOX1 |
| CYP3A4 |
| CYP1A2 |
| CAV1 |
| MYC |
| F3 |
| GJA1 |
| CYP1A1 |
| ICAM1 |
| IL1B |
| CCL2 |
| SELE |
| VCAM1 |
| PTGER3 |
| CXCL8 |
| PRKCB |
| BIRC5 |
| DUOX2 |
| NOS3 |
| HSPB1 |
| SULT1E1 |
| IL2RA |
| NR1I2 |
| CYP1B1 |
| CCNB1 |
| PLAT |
| THBD |
| SERPINE1 |
| COL1A1 |
| IFNG |
| ALOX5 |
| IL1A |
| MPO |
| TOP2A |
| NCF1 |
| ABCG2 |
| HAS2 |
| GSTP1 |
| NFE2L2 |
| NQO1 |
| PARP1 |
| AHR |
| PSMD3 |
| SLC2A4 |
| COL3A1 |
| CXCL11 |
| CXCL2 |
| DCAF5 |
| NR1I3 |
| CHEK2 |
| INSR |
| CLDN4 |
| PPARA |
| PPARD |
| HSF1 |
| CXCL10 |
| CHUK |
| SPP1 |
| RUNX2 |
| RASSF1 |
| E2F1 |
| E2F2 |
| ACP3 |
| CTSD |
| IGFBP3 |
| IGF2 |
| CD40LG |
| IRF1 |
| ERBB3 |
| PON1 |
| DIO1 |
| PCOLCE |
| NPEPPS |
| HK2 |
| RASA1 |
| GSTM1 |
| GSTM2 |

Supplementary Table 4. The feature importance of the top 5 important genes in 4 models

| Genes | Feature importance | Model |
| --- | --- | --- |
| PPARG | 0.400280315 | GLM |
| EGFR | 0.409578078 | GLM |
| FOS | 0.42195042 | GLM |
| CASP3 | 0.422761343 | GLM |
| IL6 | 0.431932773 | GLM |
| EGF | 0.320182588 | RF |
| EGFR | 0.32025833 | RF |
| PPARG | 0.324975611 | RF |
| CASP3 | 0.344866164 | RF |
| FOS | 0.3808267 | RF |
| HIF1A | 0.31492154 | SVM |
| CASP8 | 0.315751977 | SVM |
| FOS | 0.315884263 | SVM |
| EGFR | 0.316780349 | SVM |
| PPARG | 0.322879804 | SVM |
| MAPK8 | 0.325693262 | XGB |
| CASP8 | 0.327820864 | XGB |
| PPARG | 0.335701206 | XGB |
| CYCS | 0.338400557 | XGB |
| FOS | 0.372755334 | XGB |

Supplementary Table 5. The contents of the 3 compounds in RKFJ Decoction (2 mg/mL) determined by HPLC

| **No.** | **Retention**  **Time (min)** | **Compound** | **Calibration**  **curve** | **R2** | **Sample** |
| --- | --- | --- | --- | --- | --- |
| **Concentration (μg/mL)** |
| **1** | 12.264 | Luteolin | y=60.955x-56.14 | 0.9998 | 23.234±4.58 |
| **2** | 12.662 | Quercetin | y=39.45x-14.746 | 1 | 23.429±7.64 |
| **3** | 18.274 | baicalein | y=161.93x-349.23 | 0.9997 | 15.245±2.79 |

# Supplementary Figures


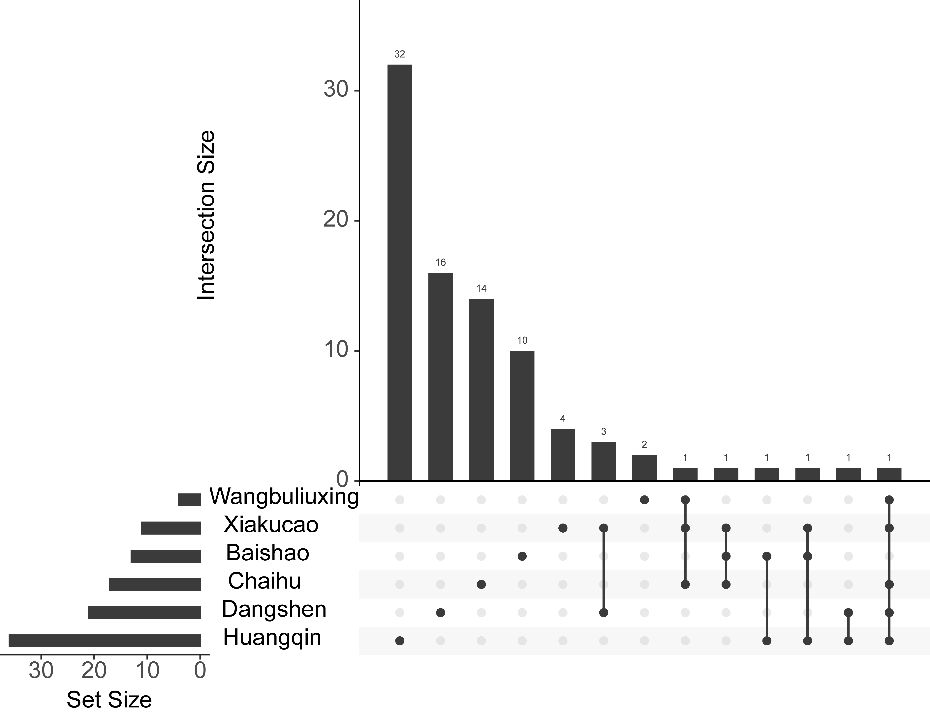


Supplementary Figure 1. Venn plot of the molecules from the 6 herbs


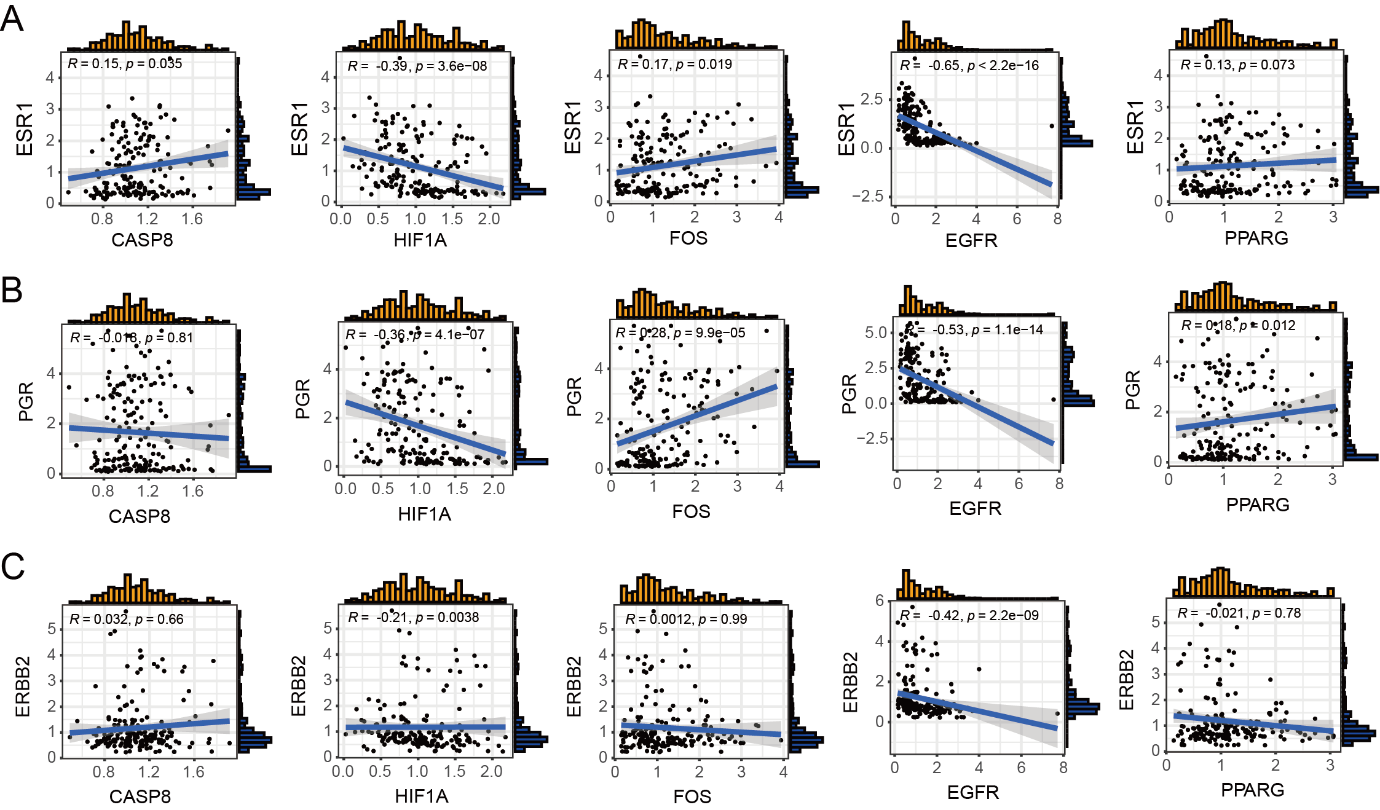


**Supplementary Figure 2.** The correlation analysis between 5 predictor genes (CASP8, HIF1A, FOS, EGFR, PPARG) and 3 biomarkers of breast cancer within an additional GSE22820 dataset including (A) ESR1, (B) PGR (C) ERBB2.


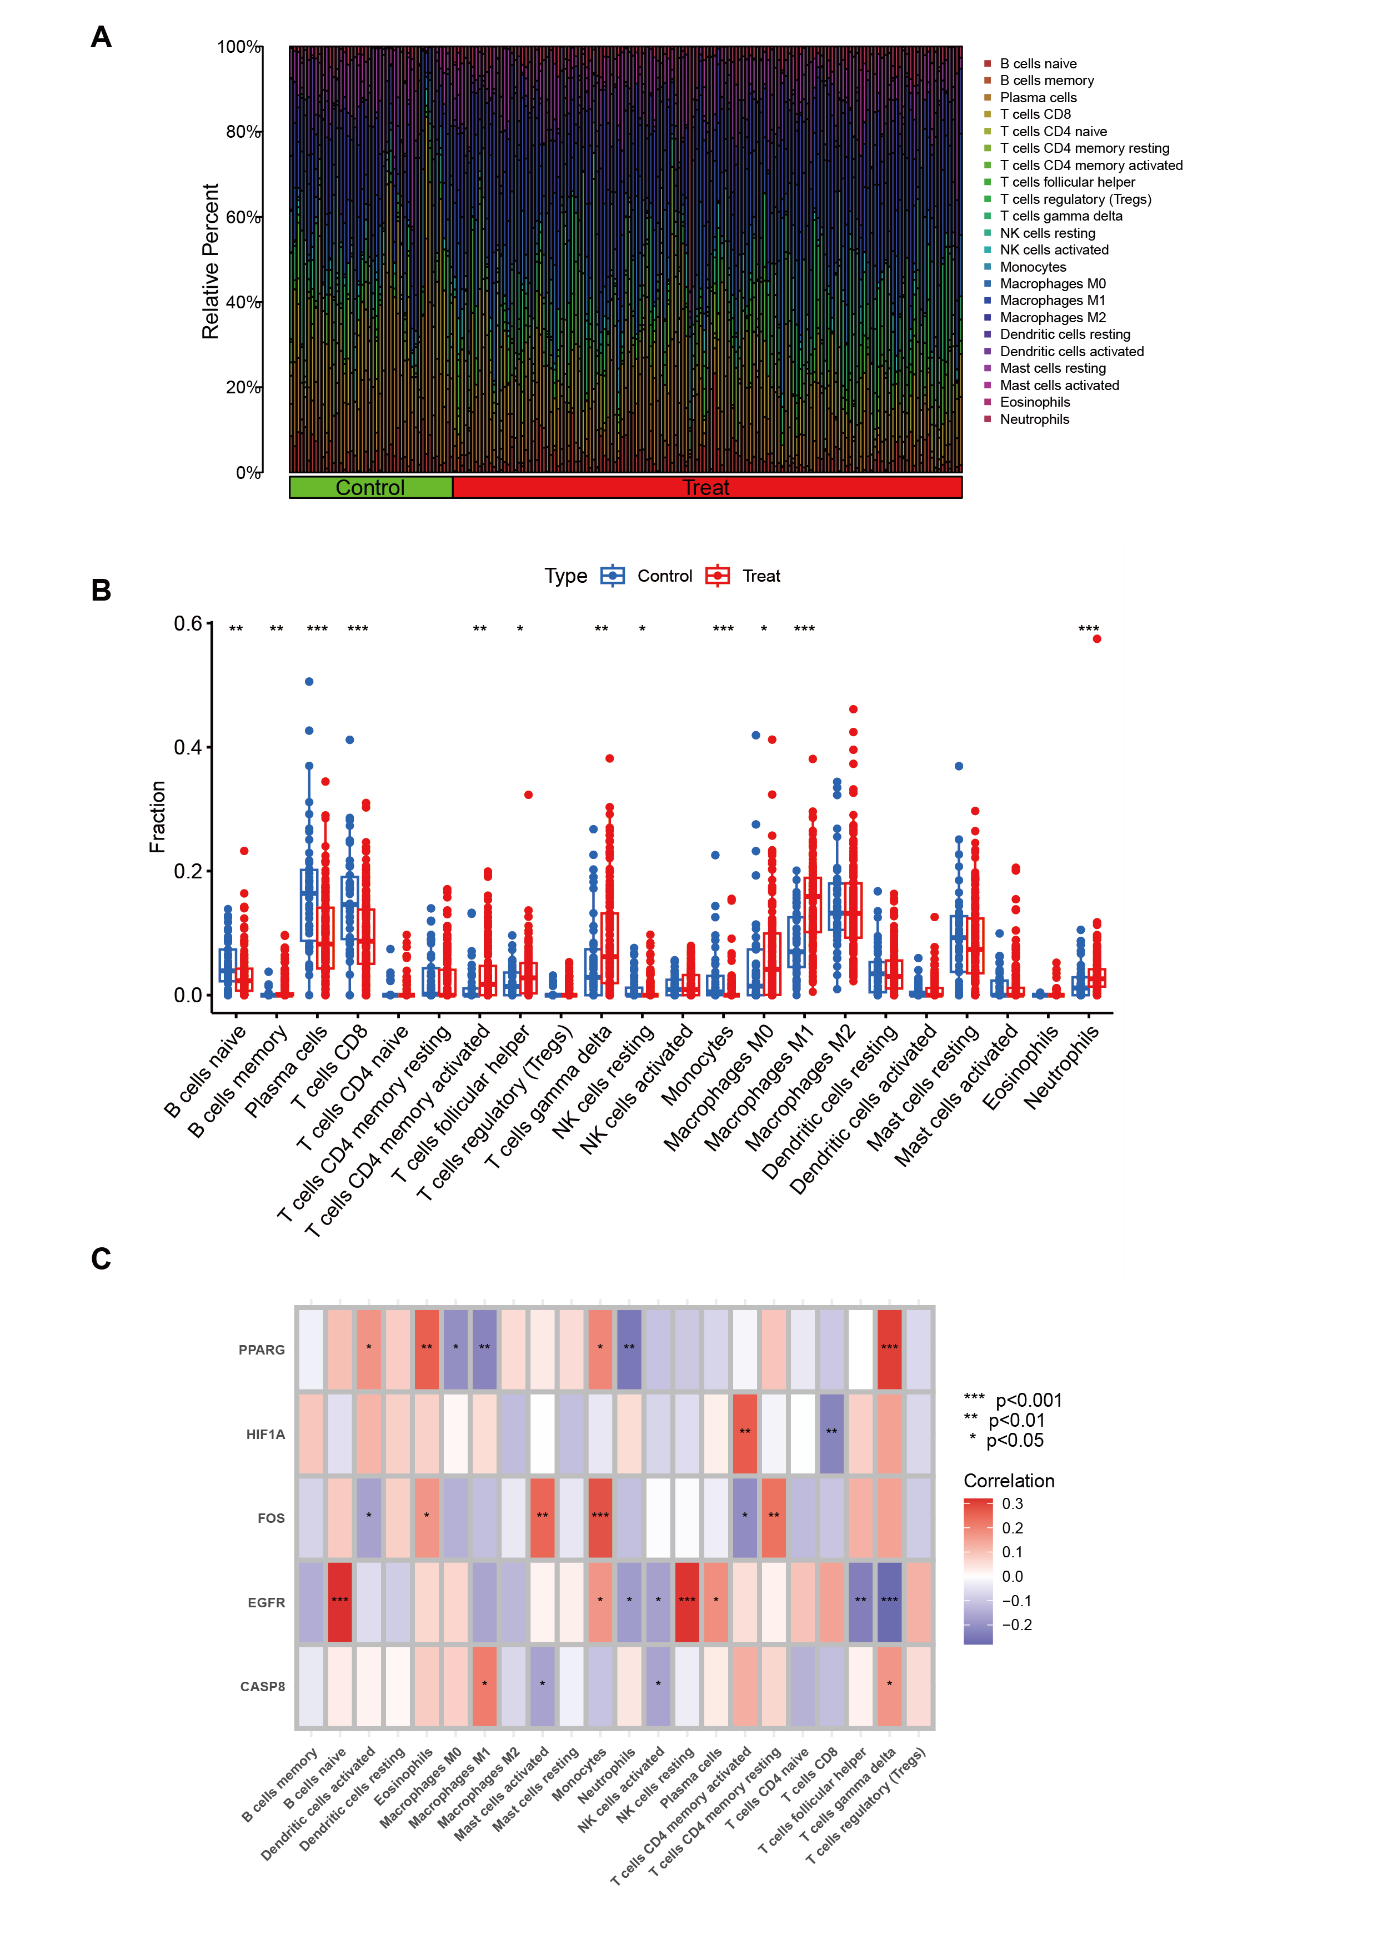


**Supplementary Figure 3.** Immune cell infiltration and predictor genes correlations analysis. (A) Proportion of 22 immune infiltration cells in the normal and breast cancer samples. (B) The expression differences of the 22 immune infiltration cells. ***p < 0.001,**p < 0.01 and *p < 0.05. (C) Correlation analysis between 5 predictor genes and 22 immune infiltration cells. Control: normal samples, Treat: breast cancer samples.


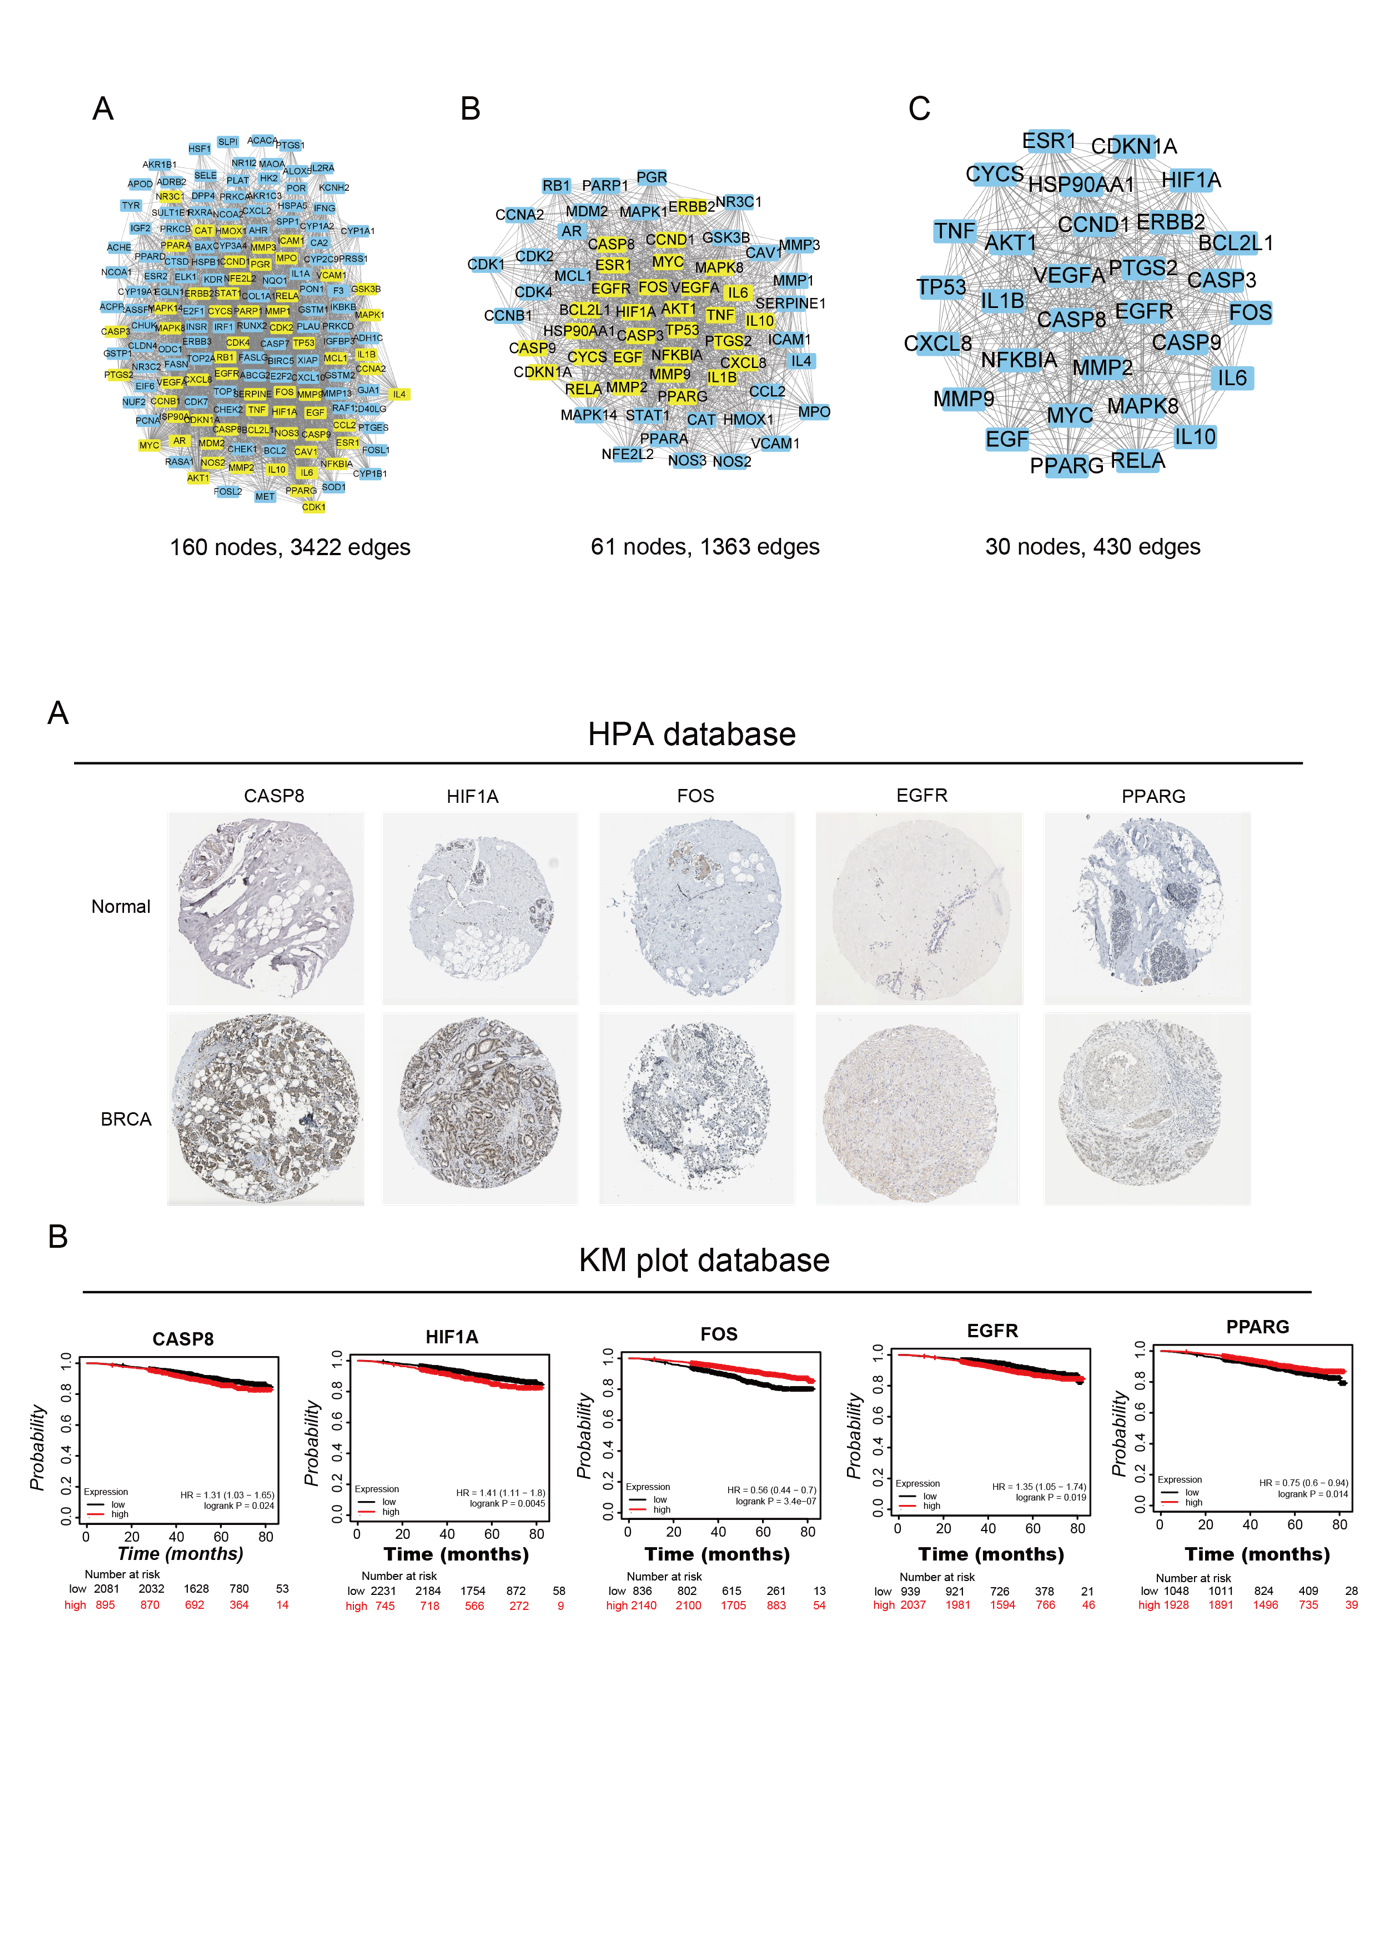


**Supplementary Figure 4.** Clinical prognostic values of the predictor genes. (A) The protein levels in the normal and breast cancer samples. BRCA: breast cancer. The histology images were obtained from HPA database. (B) The effects of the expression level of the 5 genes on the survival probability. The plot was analyzed through KM plot database based on 2976 patients.


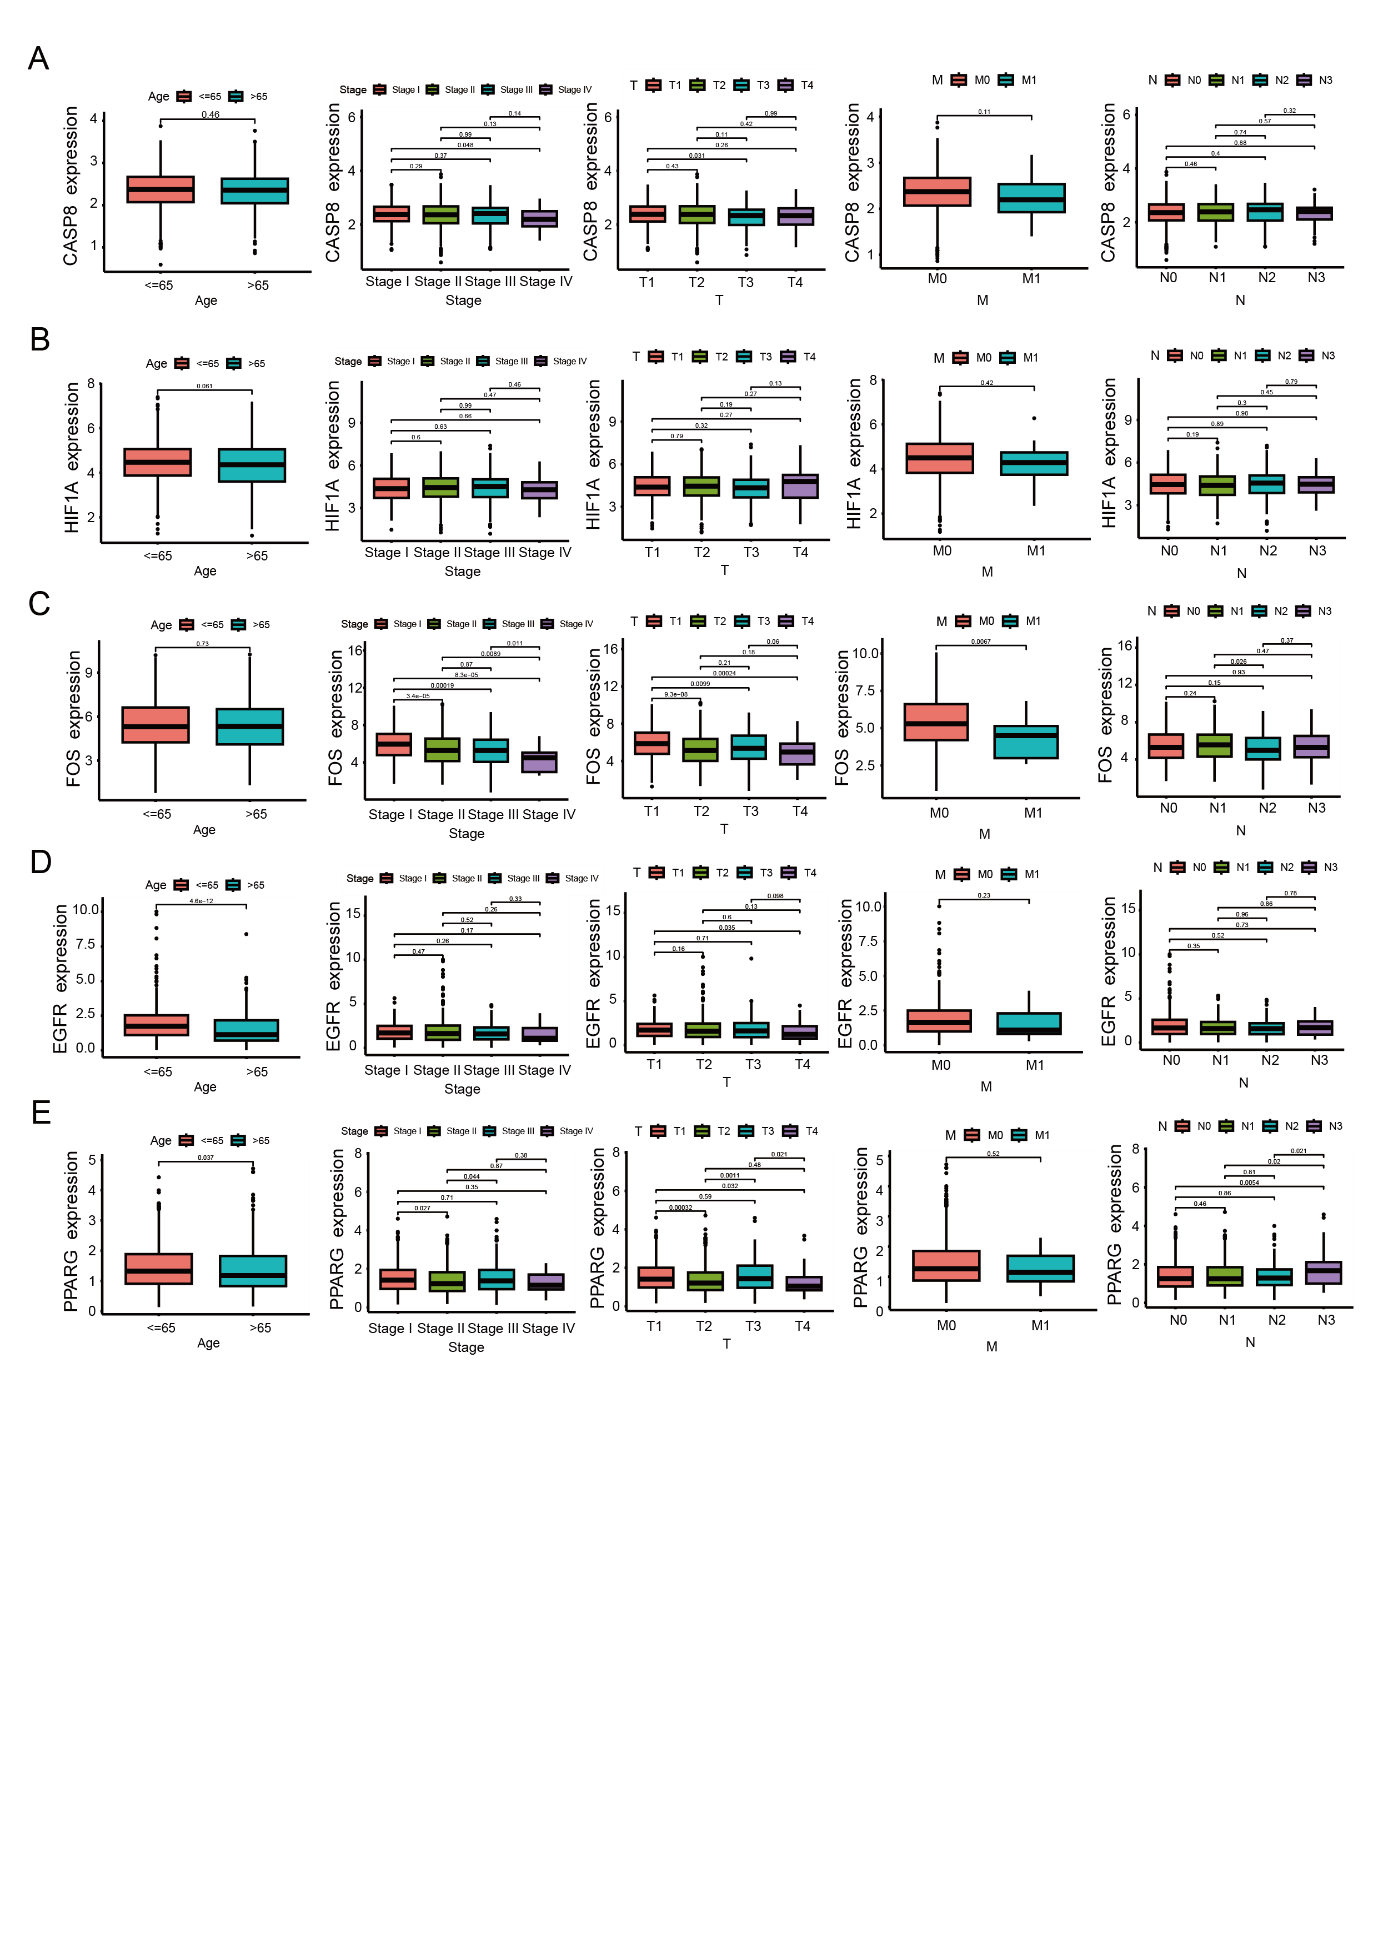


**Supplementary Figure 5.** The expression levels of the 5 predictor genes at various clinicopathological features including age, tumor stage and TMN stage. (A) CASP8. (B) HIF1A. (C) FOS. (3) EGFR. (D) PPARG.


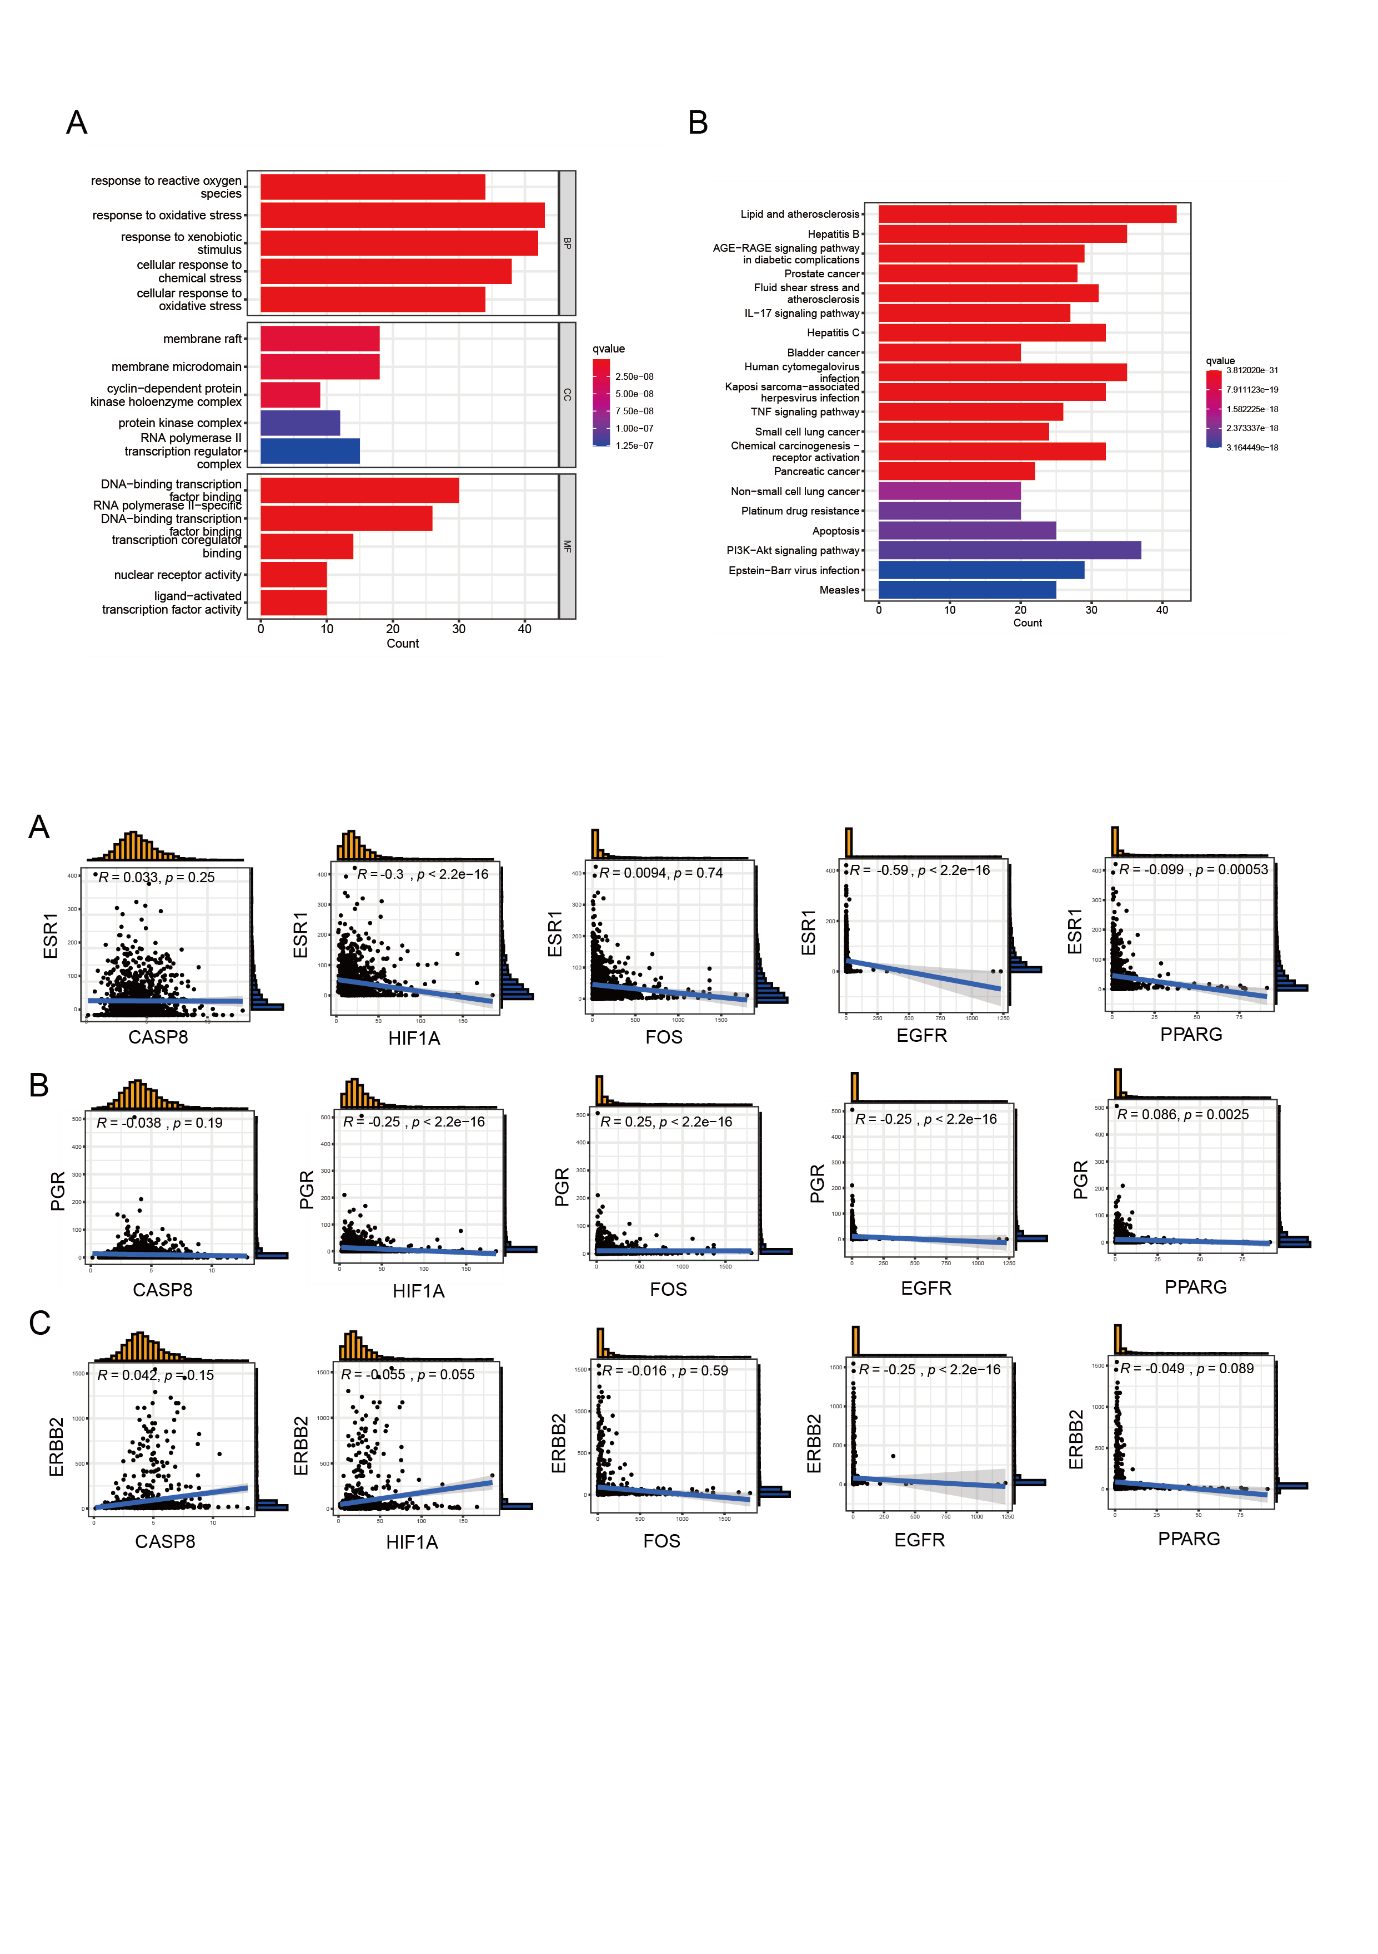


**Supplementary Figure 6.** GO and KEGG enrichment analysis. (A) GO analysis including BP, CC, MF with top 5 terms. (B) KEGG analysis with the top 15 most significant enriched terms.


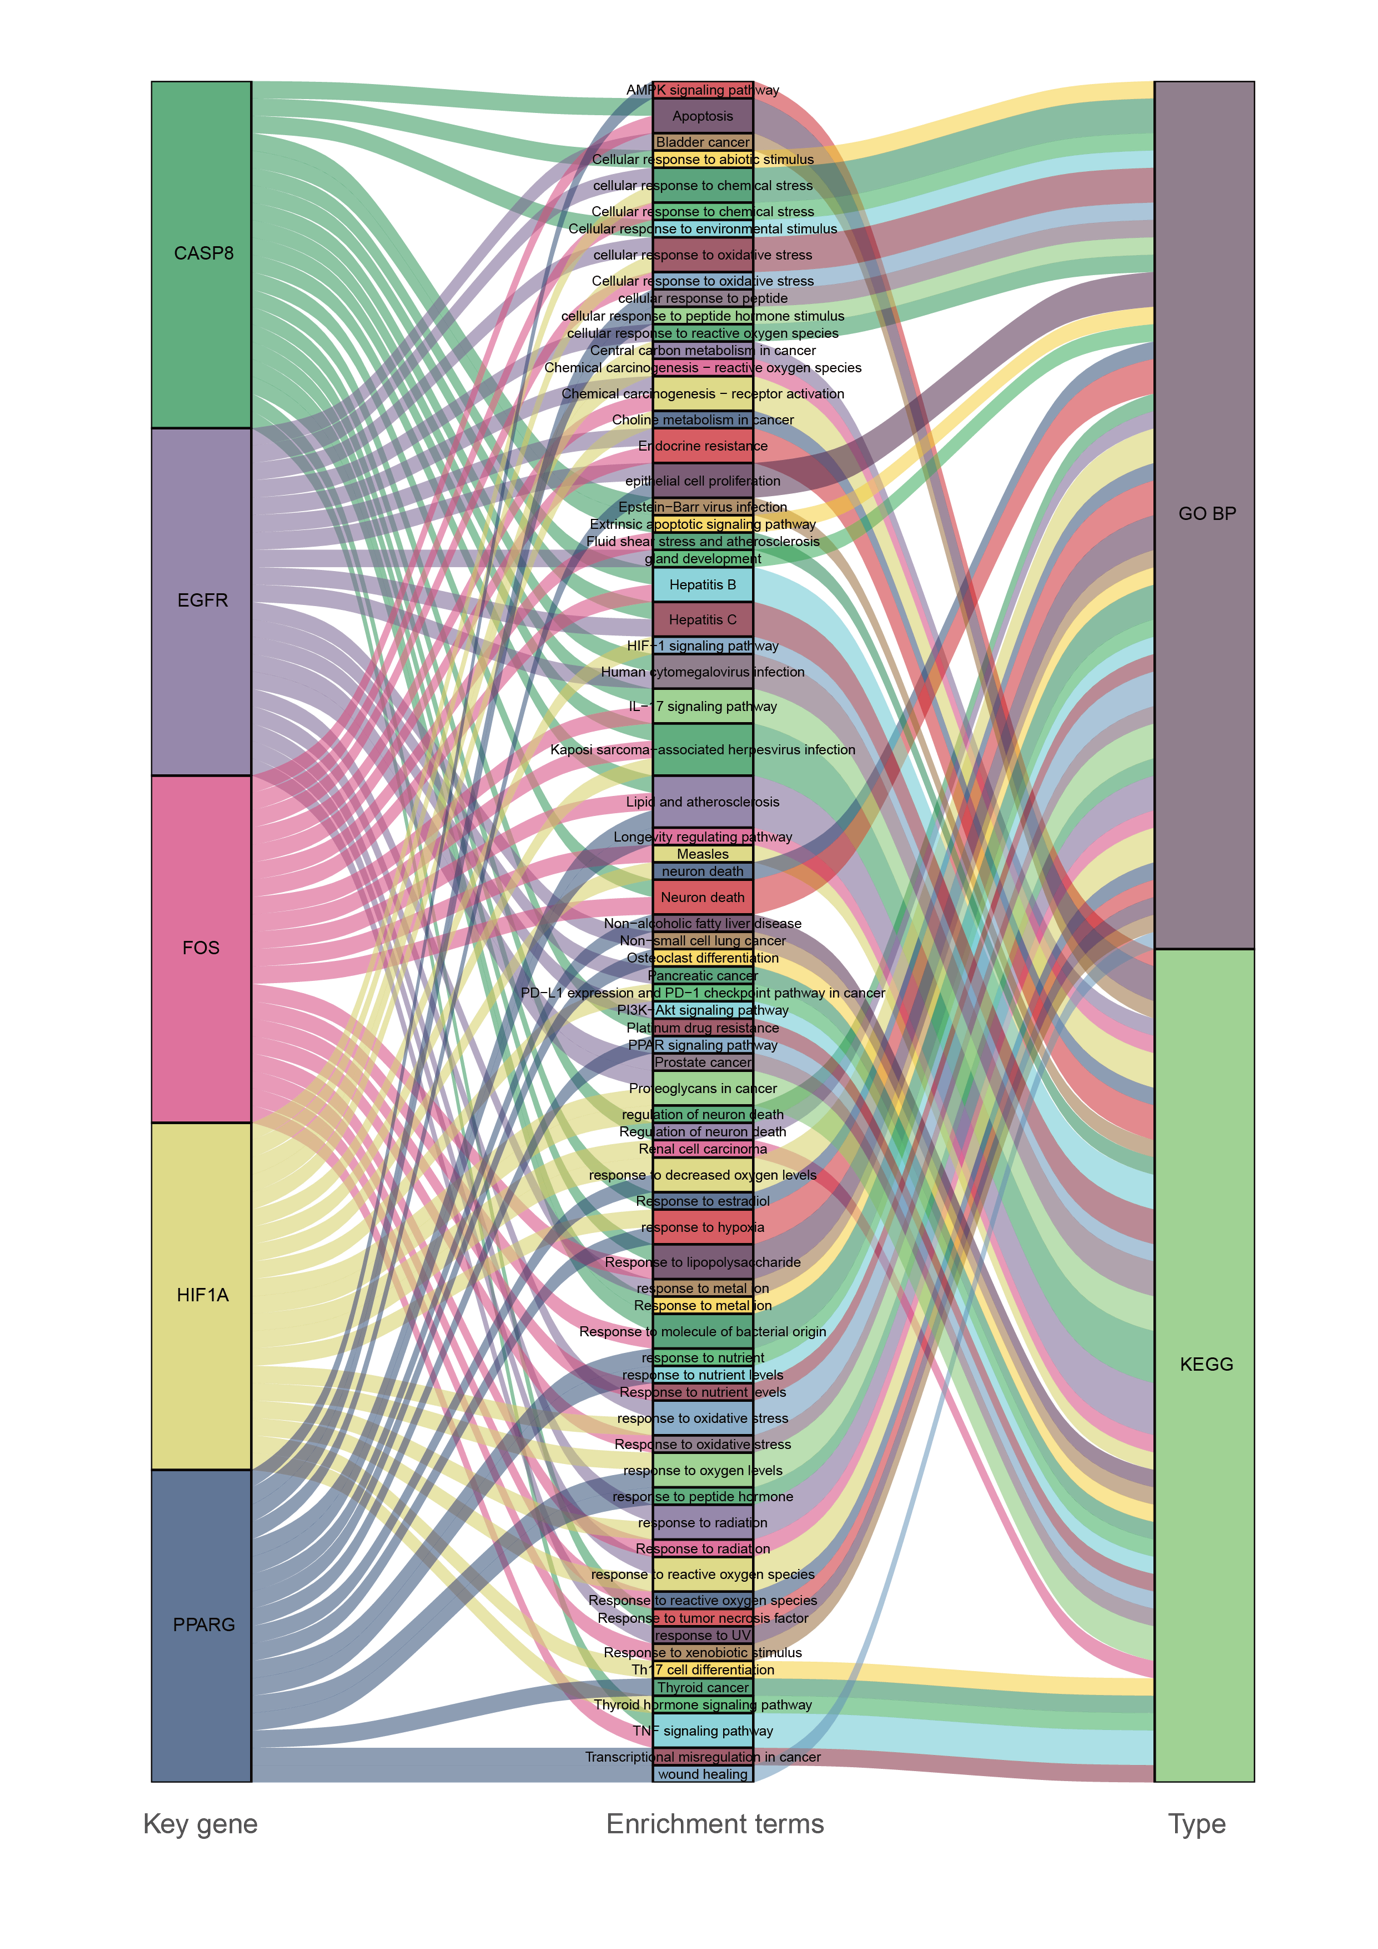


**Supplementary Figure 7.**  Sankey plot of the 5 predictor genes in the GO BP/KEGG network. The left column represents the 5 identified predictor genes, the middle column represents the top 10 enriched GO BP and KEGG terms, and the right column represents the GO BP or KEGG types.


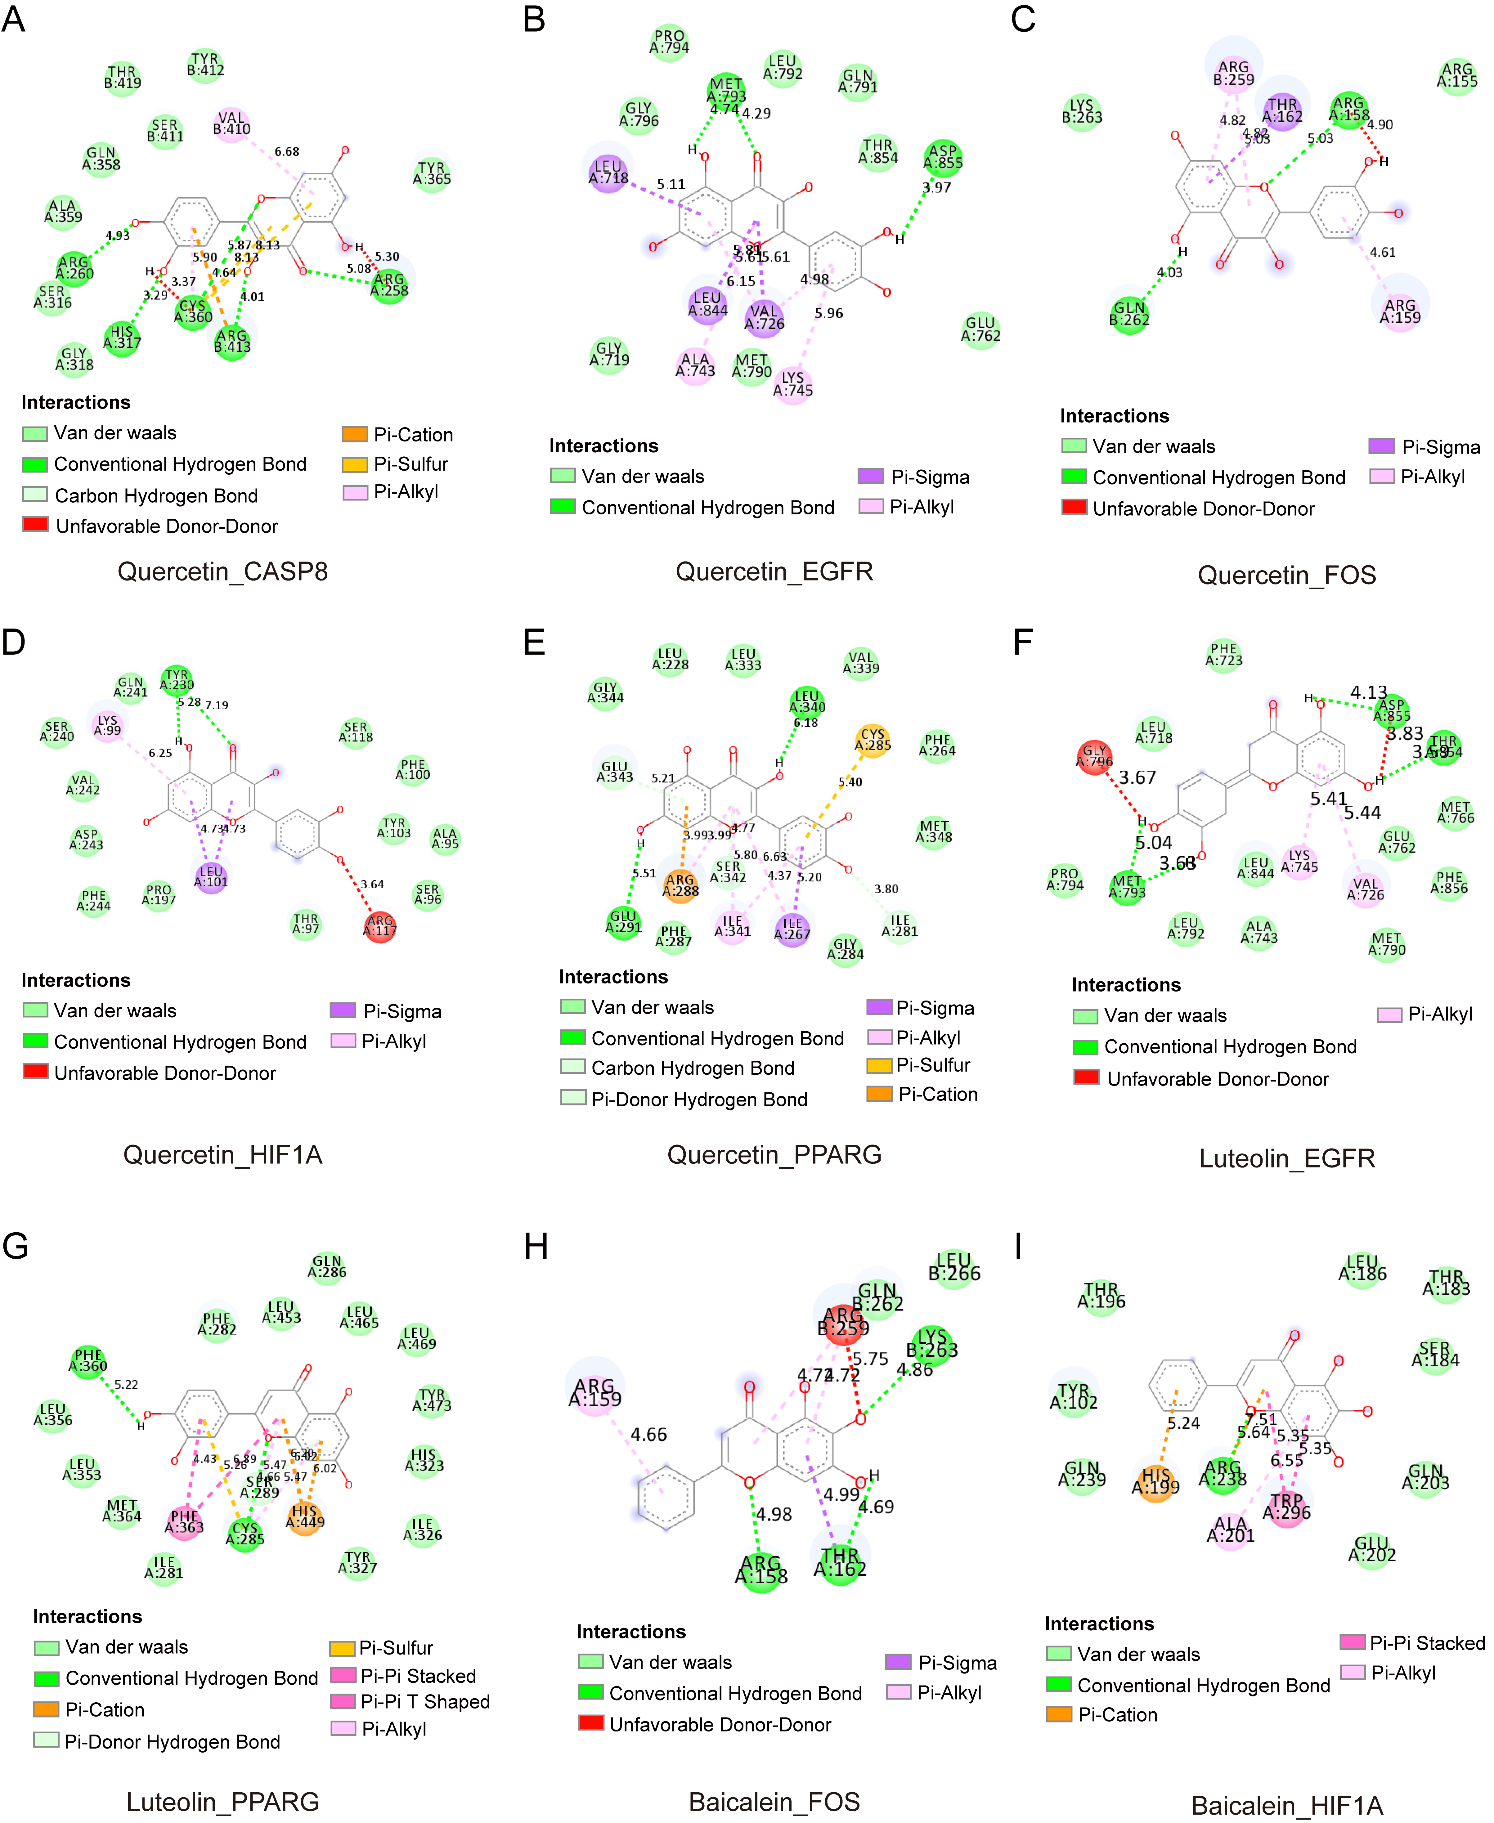


**Supplementary Figure 8.**  The interactions between the 5 predictor genes and the 3 main compounds (Quercetin, Luteolin, Balcalein) analyzed by Discovery Studio software. (A) Quercetin to CASP8. (B) Quercetin to EGFR. (C) Quercetin to FOS. (D) Quercetin to HIF1A. (E) Quercetin to PPARG. (F) Luteolin to EGFR. (G) Luteolin to PPARG. (H) Baicalein to FOS. (I) Baicalein to HIF1A.


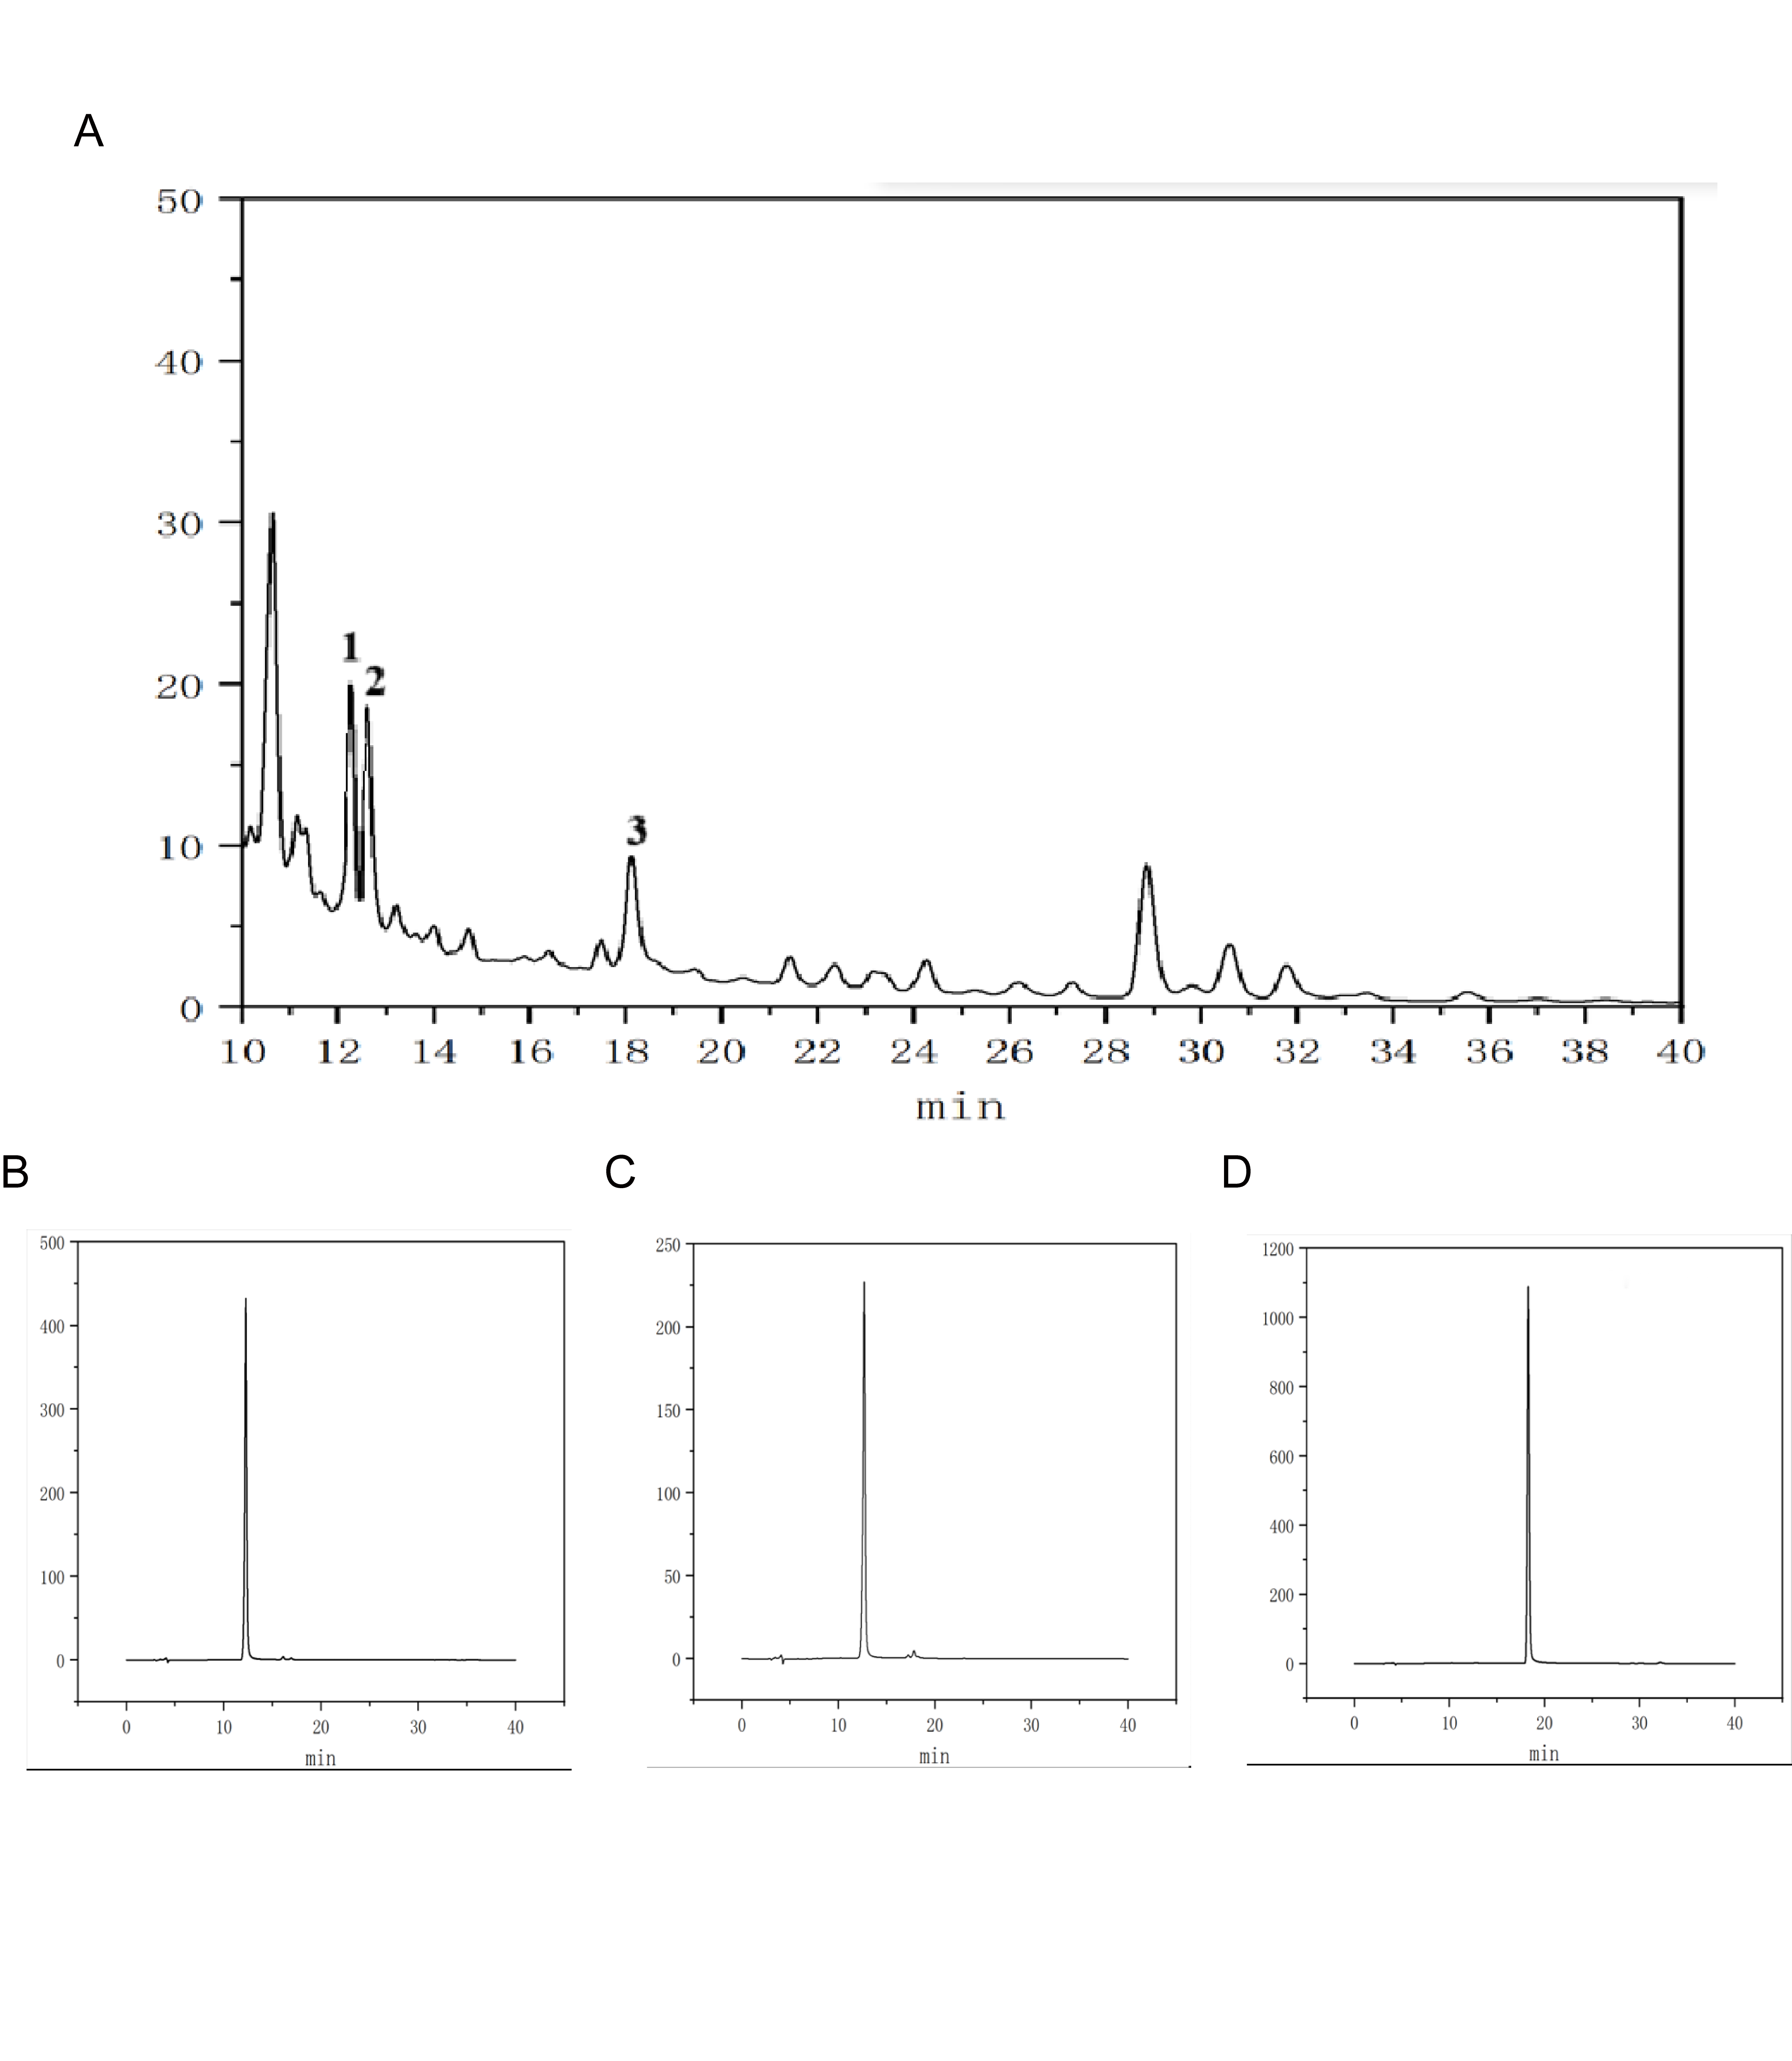


**Supplementary Figure 9.** HPLC analysis of TSGJ and three compounds detected at 280nm. (A) RKFJ solution (2 mg/mL). (B) Standard reference consisted of (B) Luteolin, (C) Quercetin, (D) Baicalein.
